# Supplementary material for: ICAM-1 promotes cancer progression by regulating SRC activity as an adapter protein in colorectal cancer
Source: PubMed Central journal article supplement (PMC9054780; doi:10.1038/s41419-022-04862-1), 2022-04-29

Fig. S1

**S1B**

SW480: si-CTR / si-ICAM #1 / si-ICAM #2

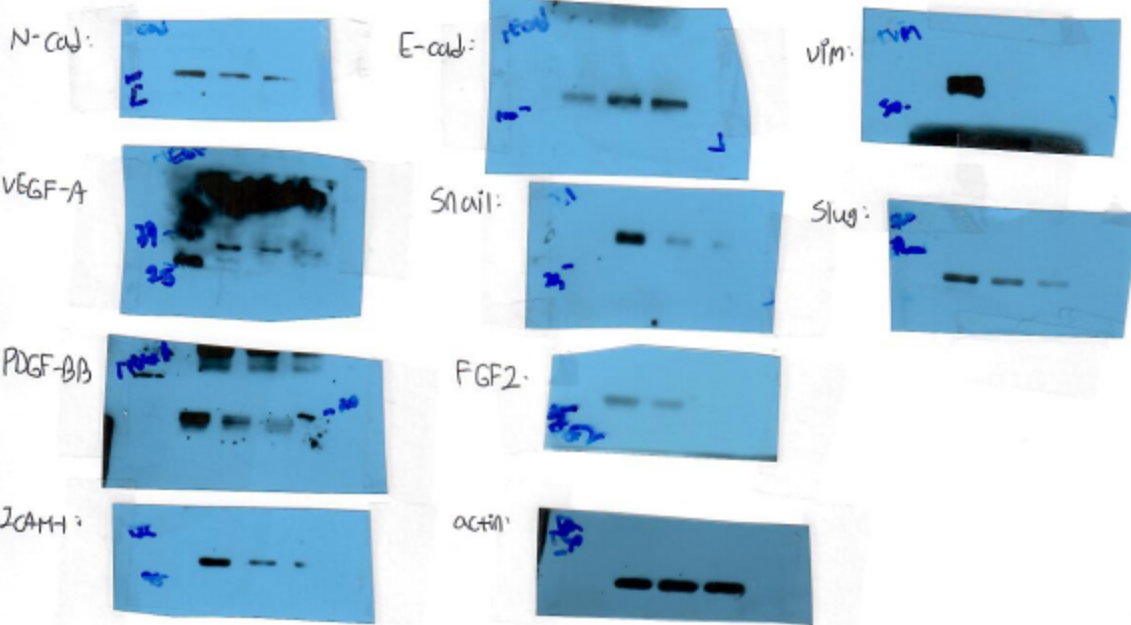

**S1F**

HT29: CTR / ICAM-0/E

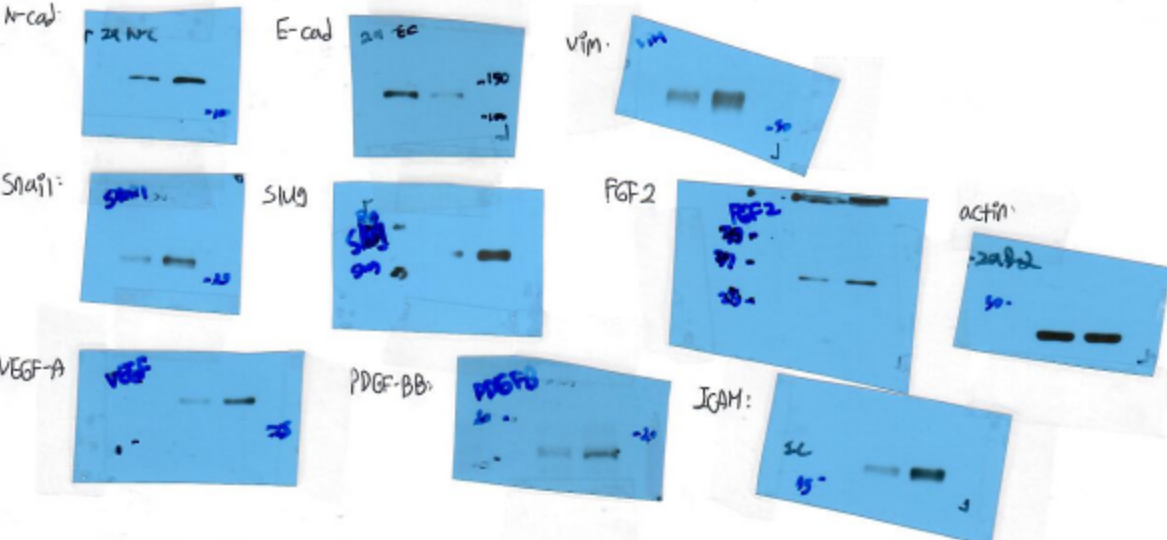

# Fig. S1

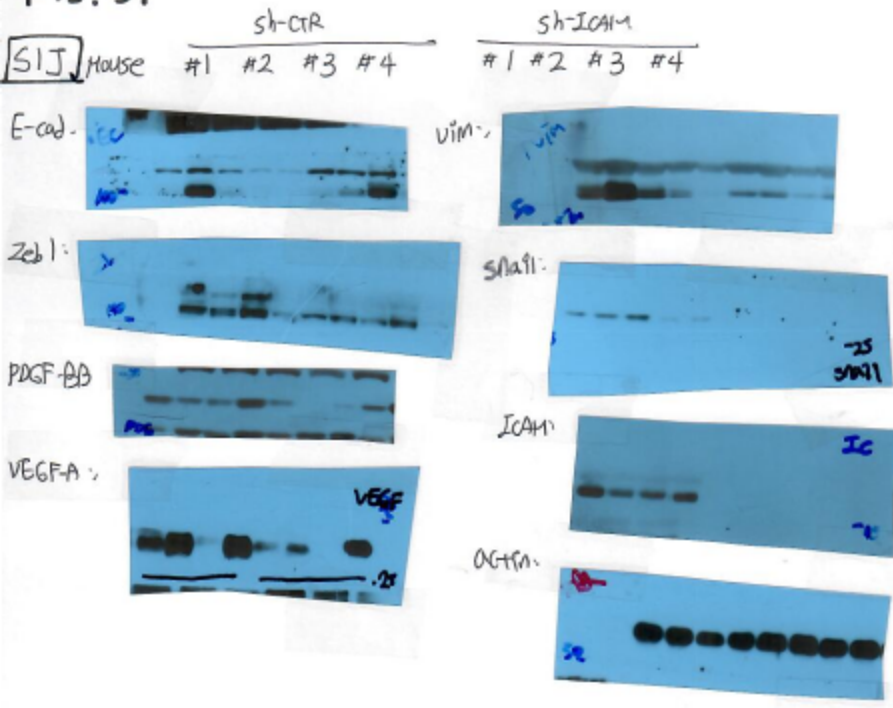

Fig. 2

2J: HT29, CTR / IC0/E / IC-16 + SRC

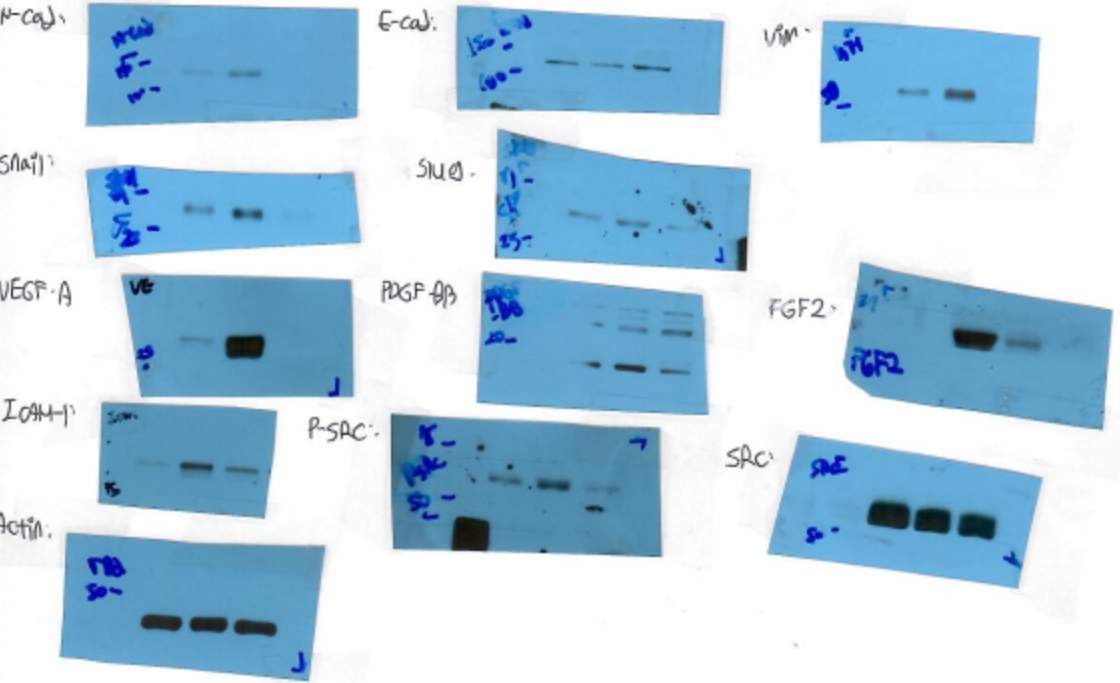

2K: HT29, CTR / IC0/E / IC0/E + SRC

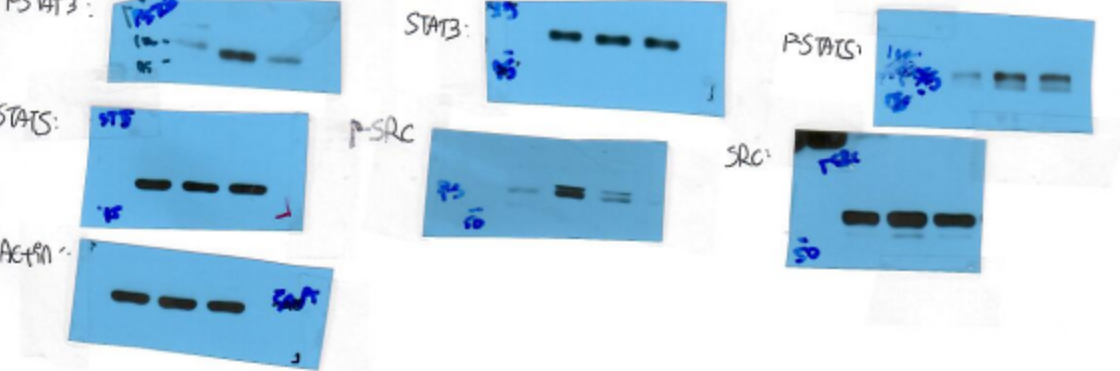

**Fig. 2**

**2A** HT9- CTR / IC91E / IC91E +STAT3<sup>9</sup>

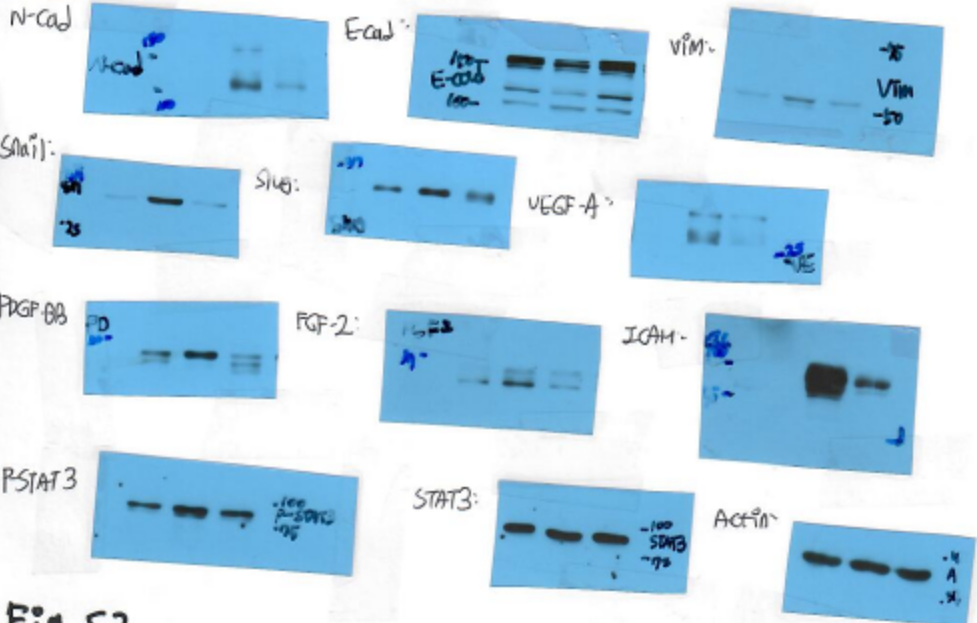

**Fig. S2**

**2A, S2A:** Sw480: CTR / si-ICAM #1 / si-ICAM #2

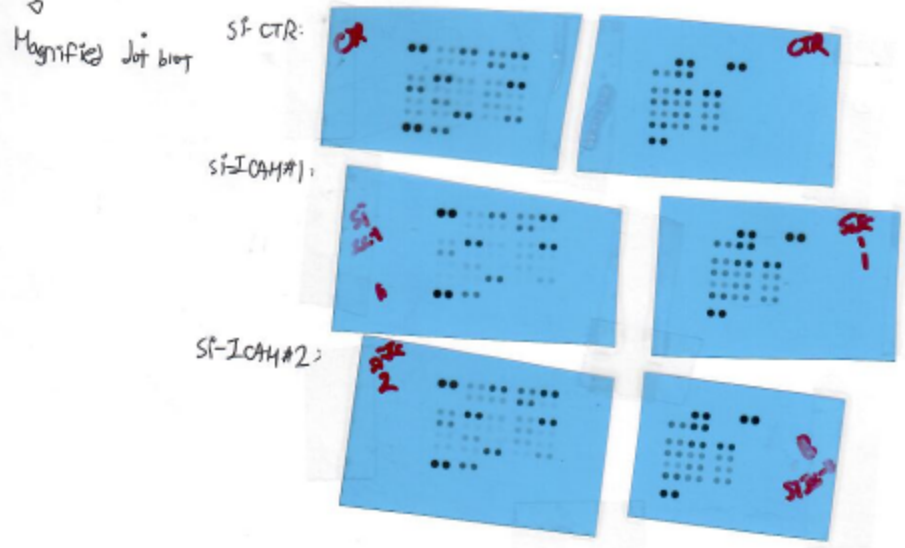

# Fig. S2

**S2C:** \*Sw480: CTR / si-IAM #1 / si-IAM #2

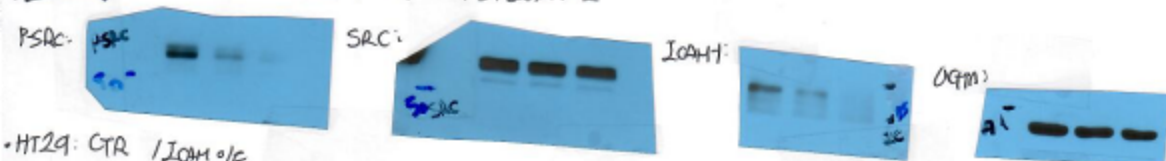

\*HT29: CTR / IAM o/E

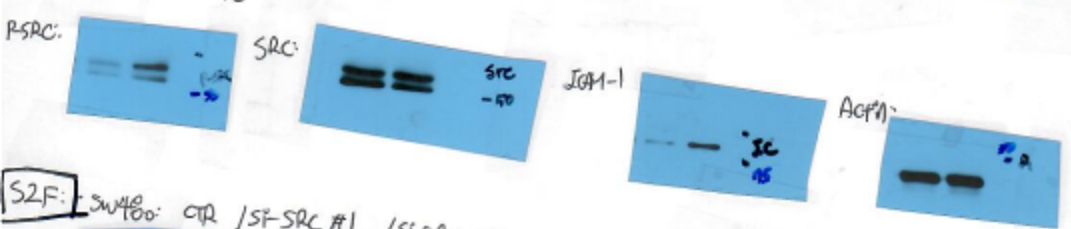

**S2F:** \*Sw480: CTR / si-SRC #1 / si-SRC #2

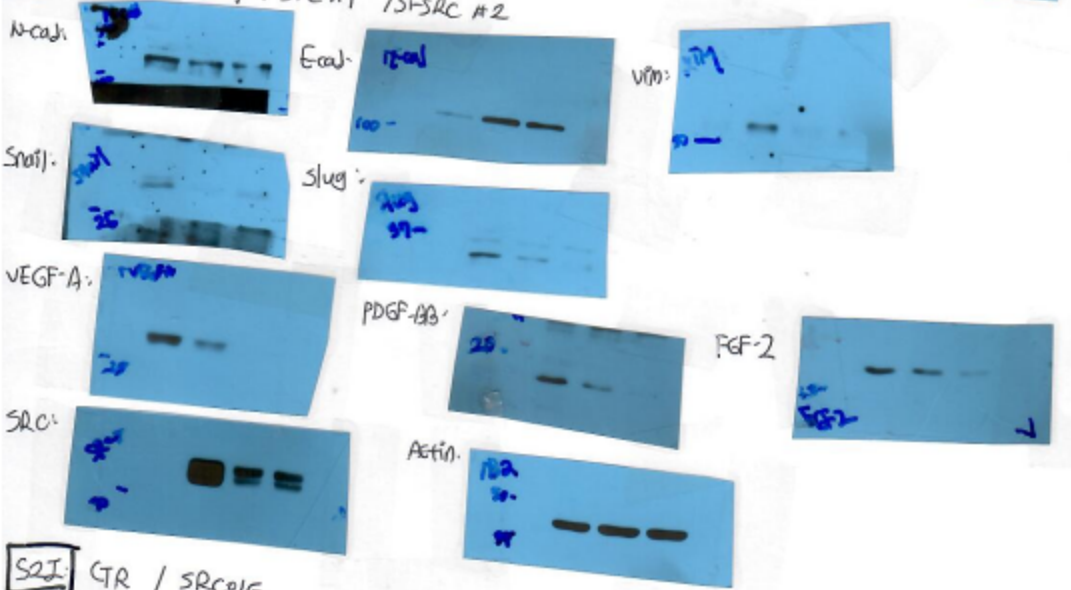

**S2J:** CTR / SRC o/E

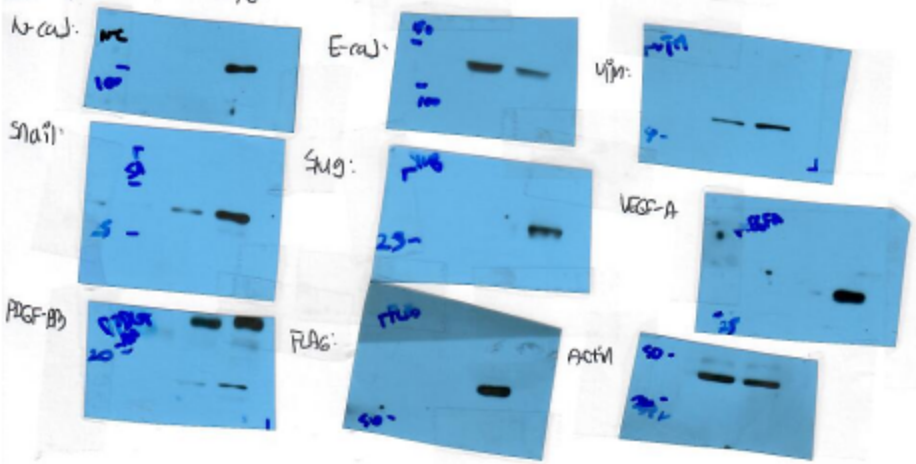

# Fig. S2

**S2L** HT29: CTR / IC<sub>101E</sub> / IC<sub>101E</sub> + si-SRC #1 / IC<sub>101E</sub> + si-SRC #2

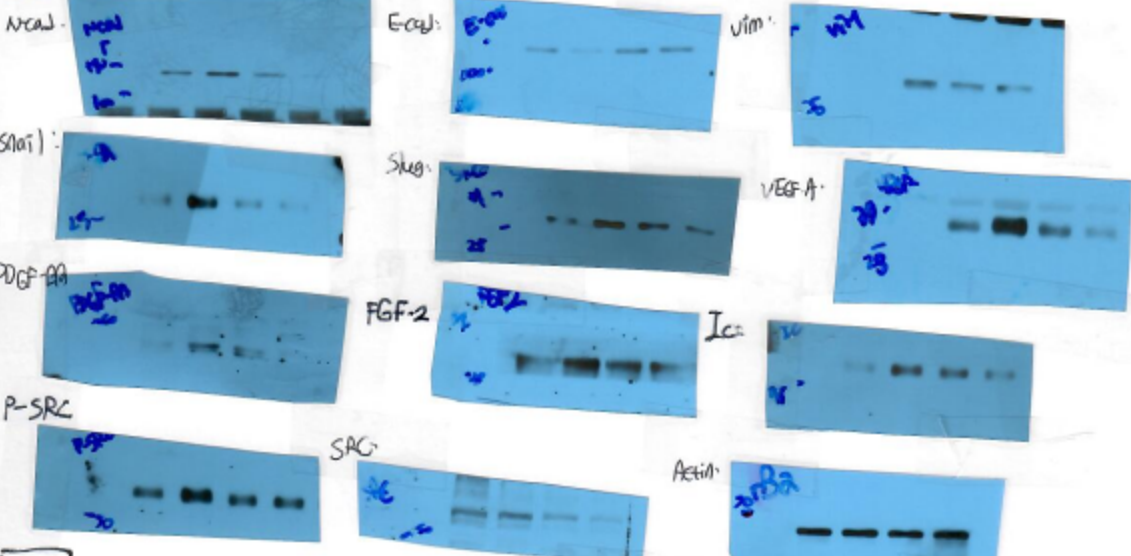

**S2M** HT29: CTR / SRC + IC / SRC + STAT3

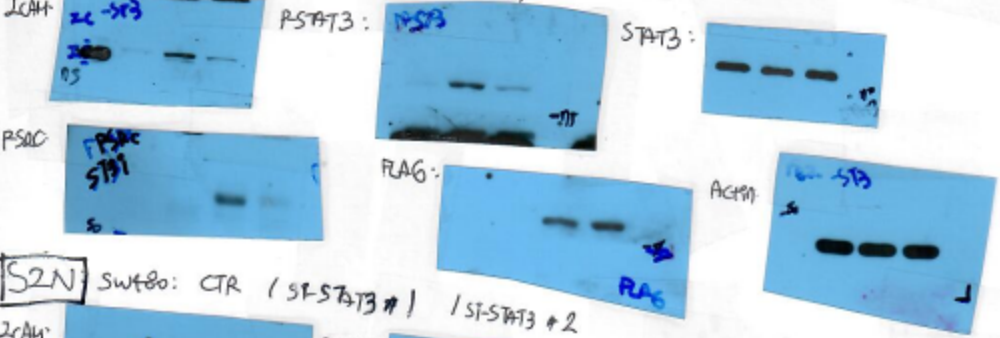

**S2N** SW620: CTR / si-STAT3 #1 / si-STAT3 #2

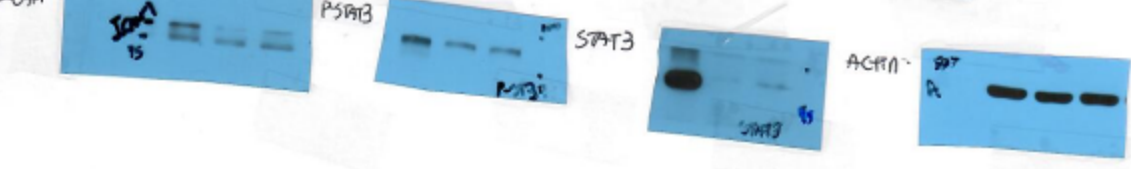

# Fig. 3

## 3A SW480

① IP: ICAM

SRC

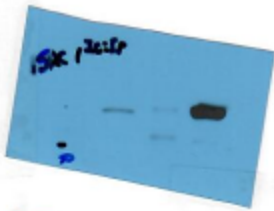

ICAM

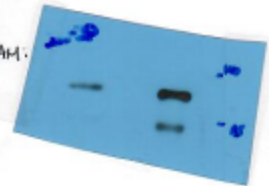

② IP: SRC

ICAM

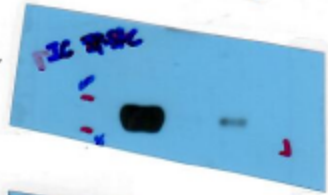

SRC

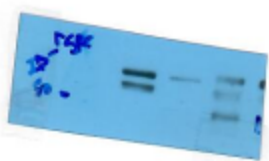

-HCT-116

① IP: ICAM

SRC

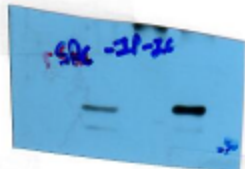

ICAM

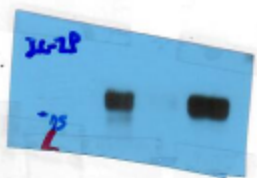

② IP: SRC

ICAM

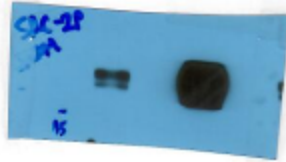

SRC

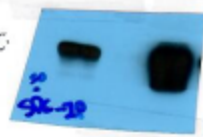

## 3C

-HT29

| IP: HA | Input |   | IgG |
|--------|-------|---|-----|
|        | -     | + |     |
| +      | -     | + | +   |
| -      | -     | + | -   |

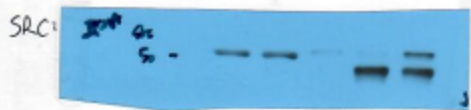

HA

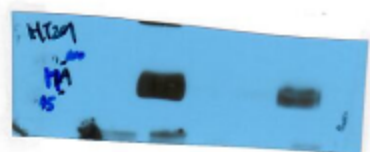

-HEK-293

| IP: HA | Input |   | IgG |
|--------|-------|---|-----|
|        | -     | + |     |
| +      | -     | + | +   |
| -      | -     | + | -   |

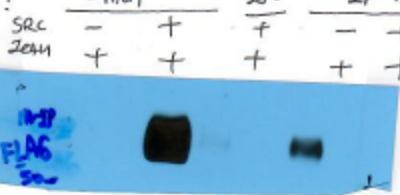

HA

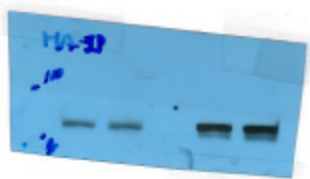

# Fig. 3

3D HEK293T SRC: + + + + IP: FLAG  
 ICM: - WT ΔCD ΔICP

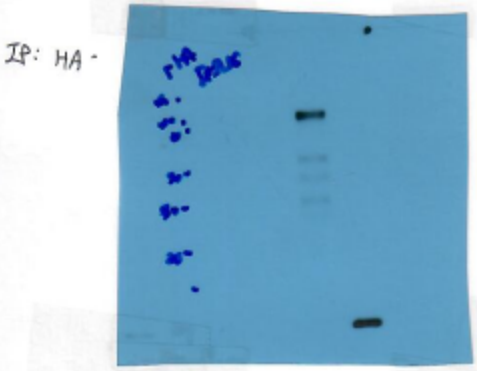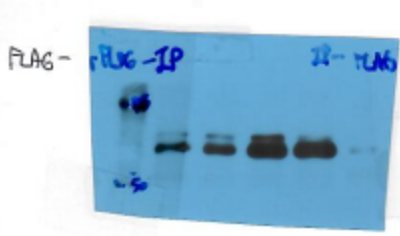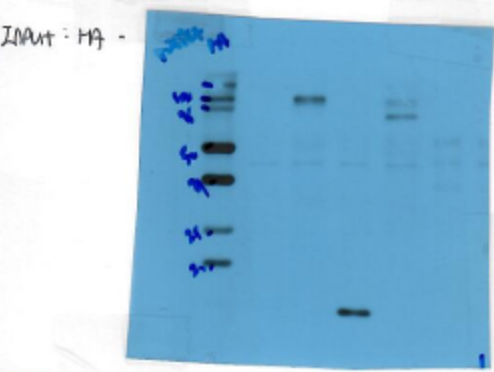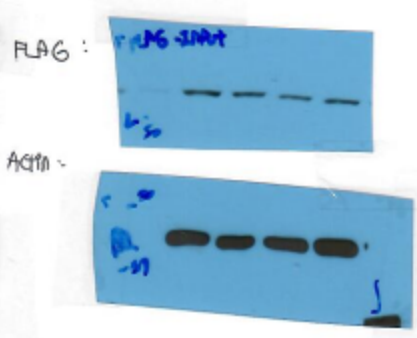

BF: HT29: ICM: - WT TA INPUT IgG IP: HA - WT TA

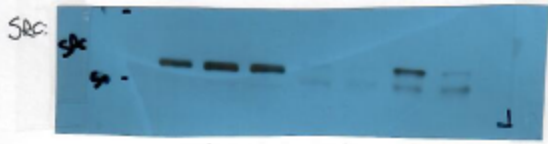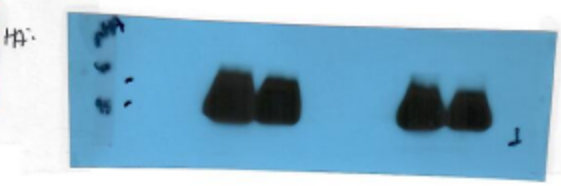

HT29: ICM: - WT YD INPUT IgG IP: SRC - WT YD

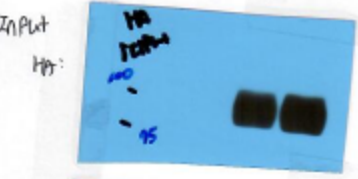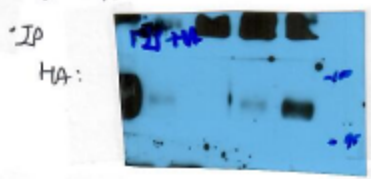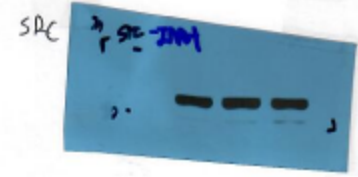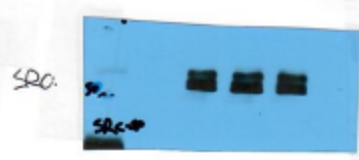



**Fig. 3**

**S3I** HT29 - CTR / WT / YA / YD

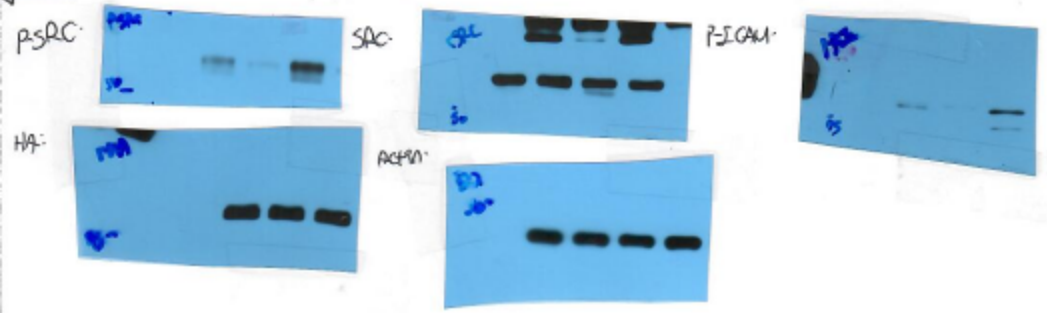

**Fig. S3**

**S3B**: HEK 293T SRC: + + + + + + +  
 IC: - WT YD - - WT YD

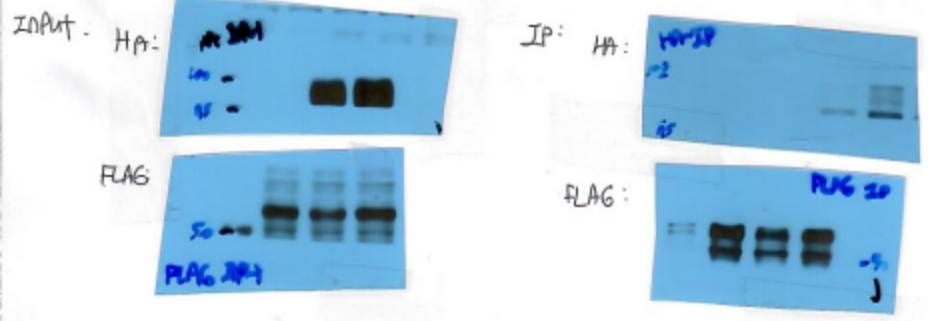

**S3C** HT29: CTR WT TA TD

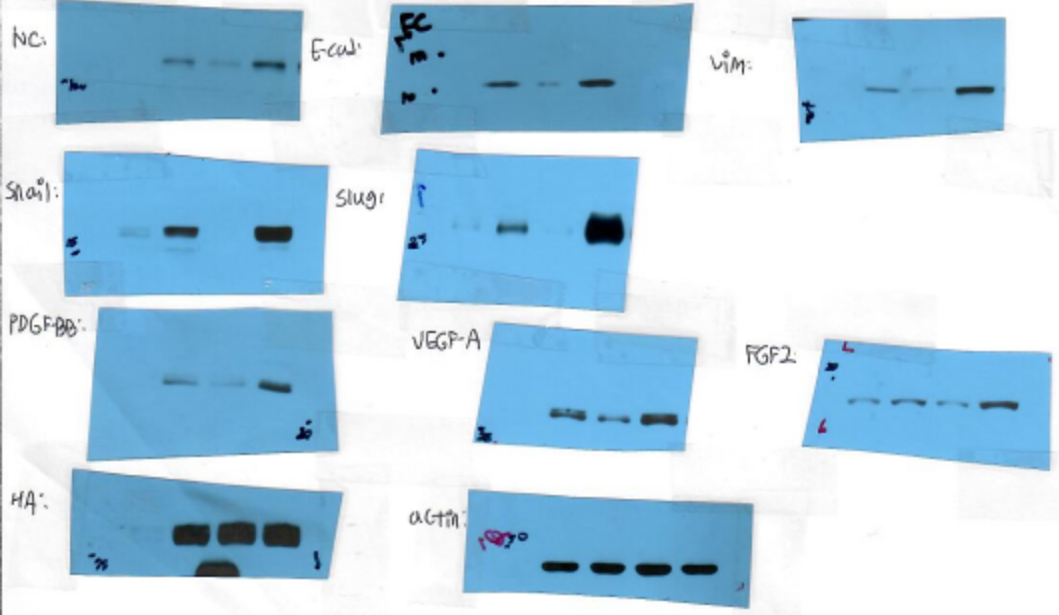

Fig. 4

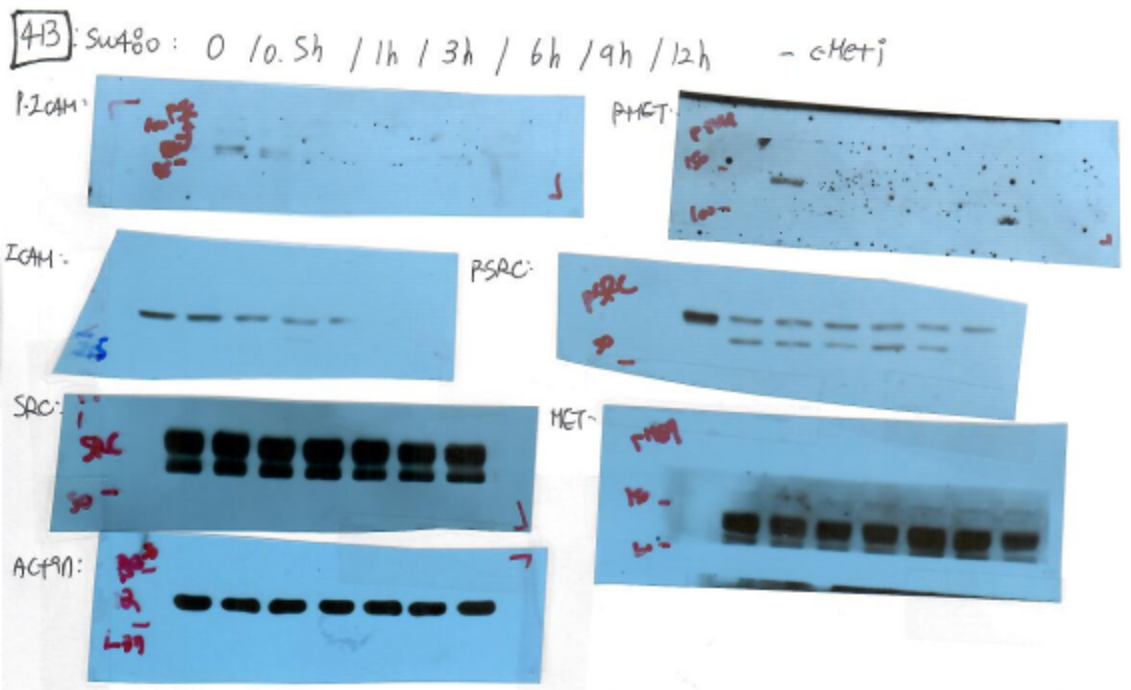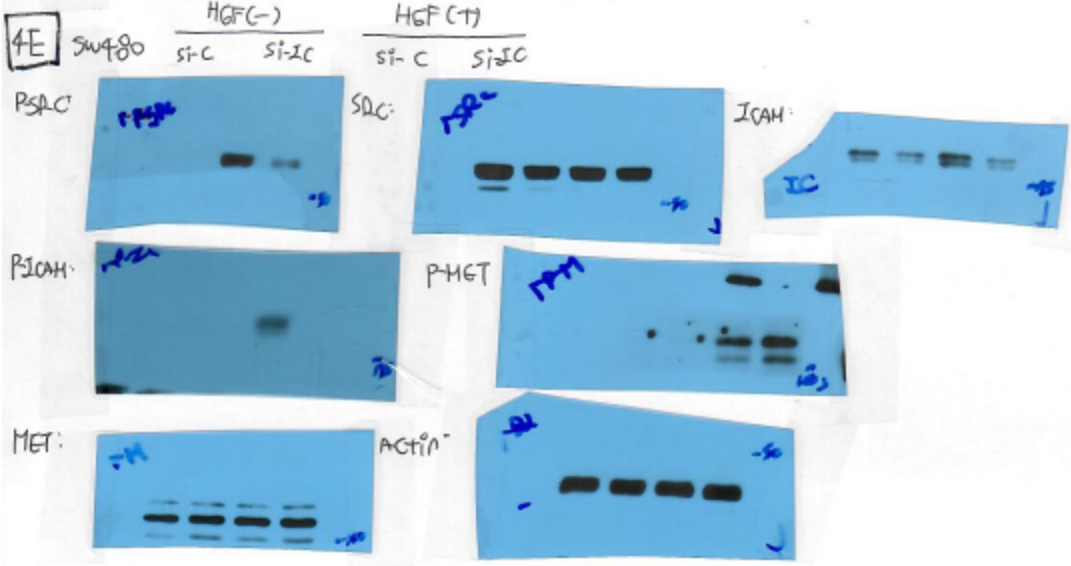

# F19-4

4F: HT29  
 c-MET: — — — — + +  
 ICAM1: — WT YA YD — WT

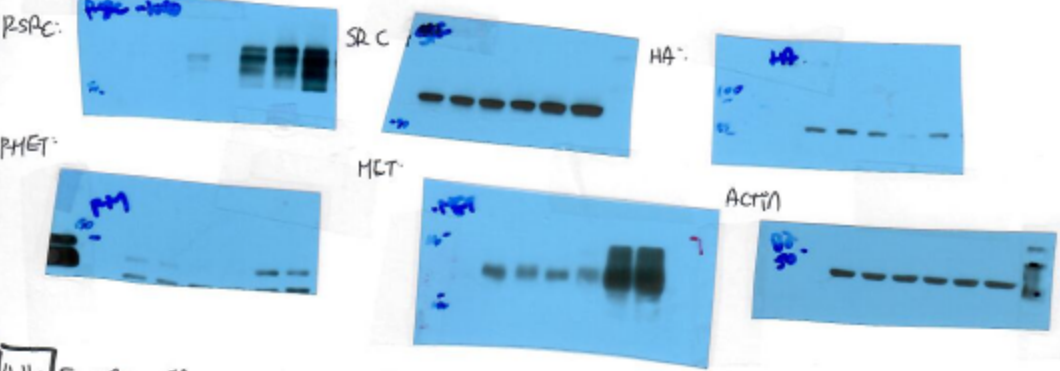

4H: Sw680 IP-ICAM

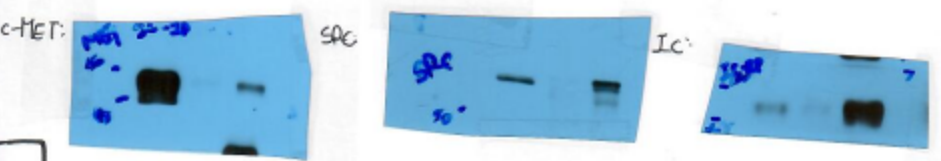

4I: Sw680  
 INPUT: si-c si-IC ZIG  
 IP: si-c si-IC

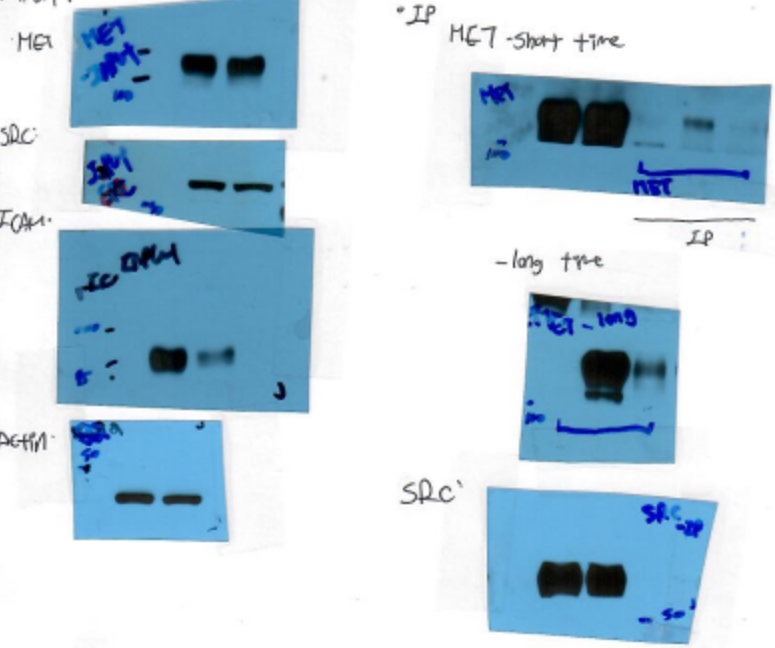

# Fig. 4

4A) HT29

|      |   |   |   |   |   |
|------|---|---|---|---|---|
| SRC  | - | + | + | + | + |
| ICAM | - | - | + | - | + |
| CHET | - | - | - | + | + |

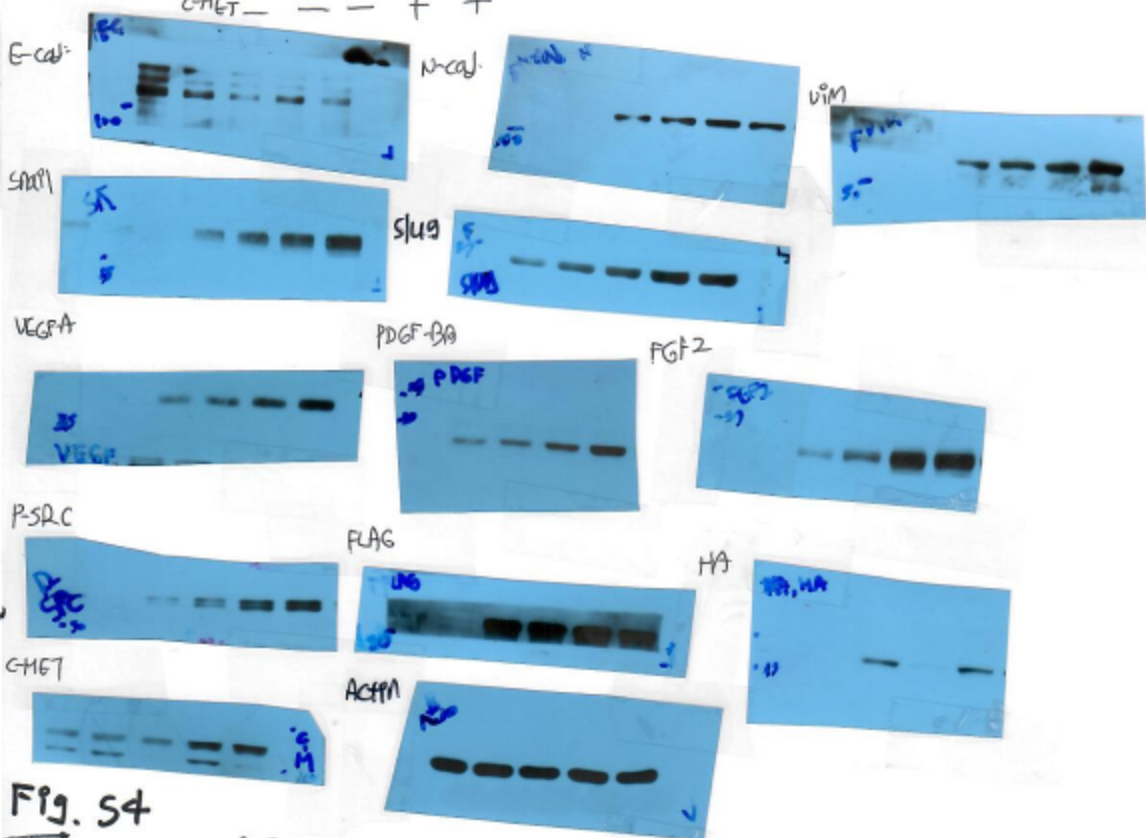

# Fig. 5A

5A) HEK293T

|      |   |    |      |      |
|------|---|----|------|------|
| CHET | + | +  | +    | +    |
| ICAM | - | WT | ΔE20 | ΔE20 |

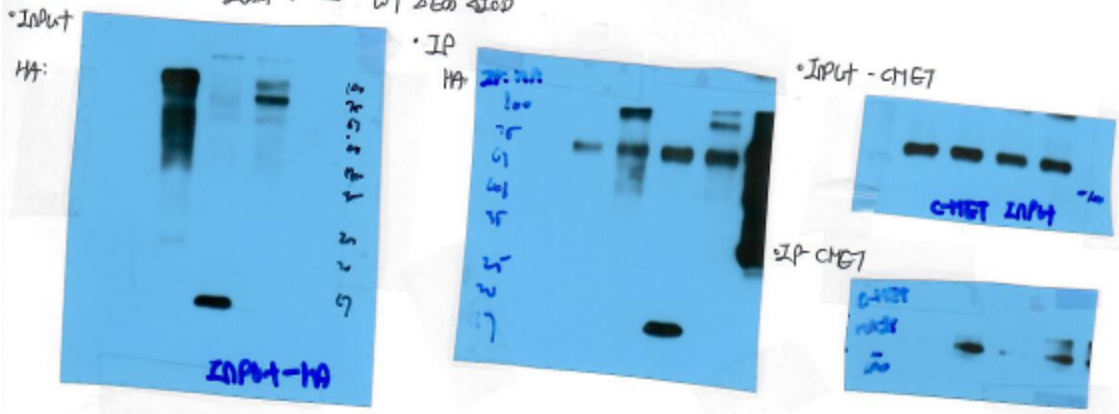

# Fig. S4

**S4D** H129      cMET: - + + + +  $\Phi$   
 ICAM: - - WT  $\Delta$ ESD  $\Delta$ IC1

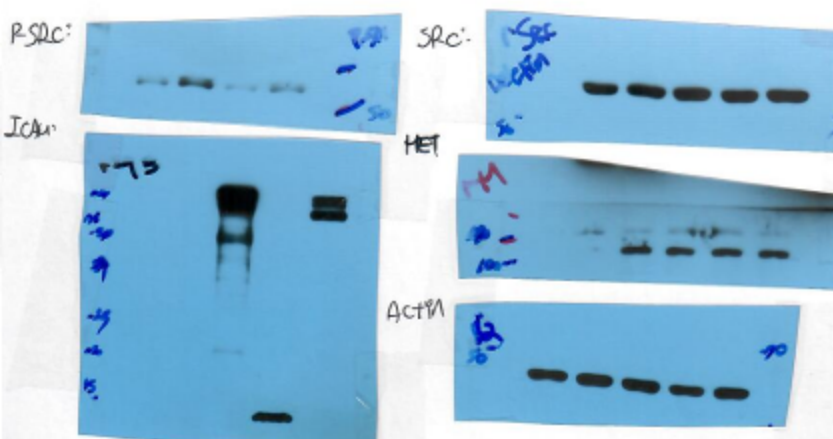

**S4D** H129      CTR / cMET    / cMET + IC    / cMET + sICAM

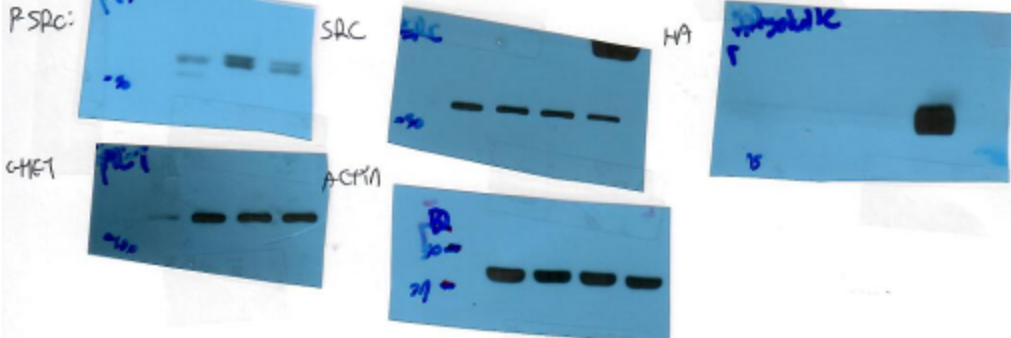

**Fig. 5**

**5B** IGM+ ab :  $\frac{\text{HGF (-)}}{- \quad +}$   $\frac{\text{HGF(+)}}{- \quad +}$

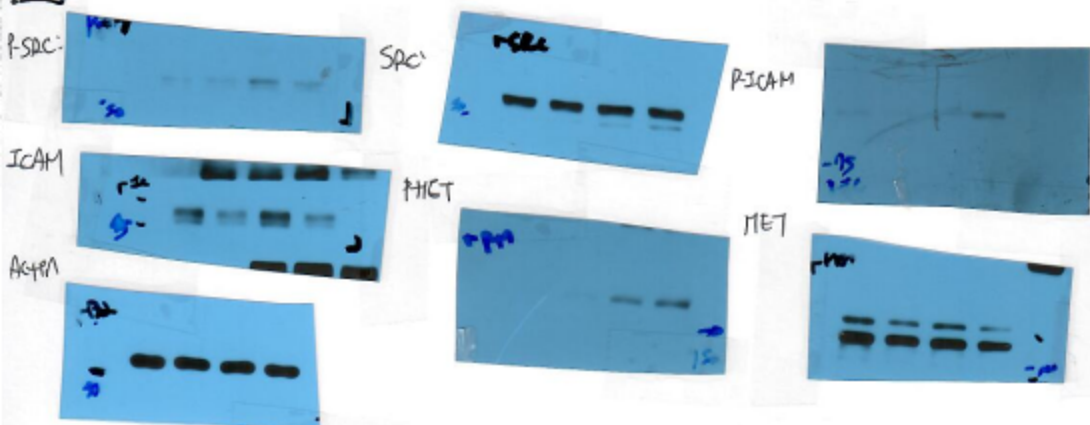

**5C** f80  $\frac{\text{Input}}{\text{CTR} \quad \text{ICab} \quad \text{IgG}}$   $\frac{\text{IP-SRC}}{\text{CTR} \quad \text{ICab}}$

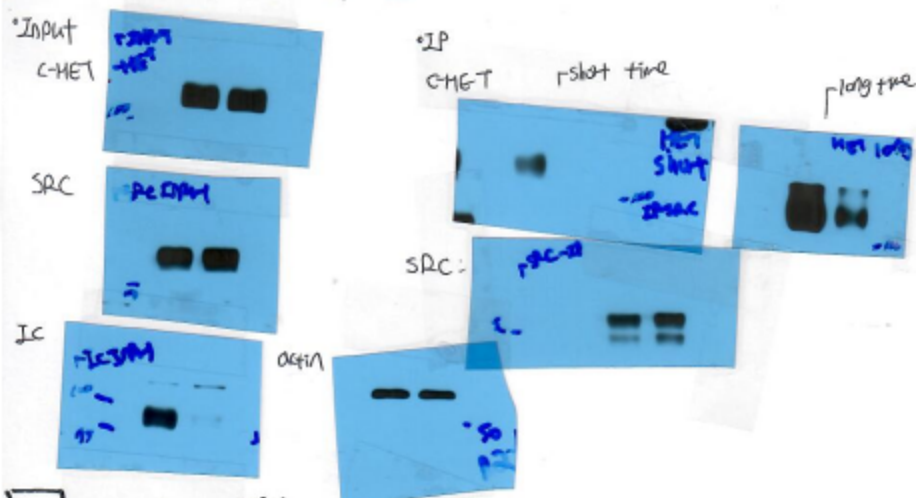

**5G** Xenograft  $\frac{\text{Input}}{\text{CTR} \quad \text{ab} \quad \text{IgG}}$   $\frac{\text{IP}}{\text{CTR} \quad \text{ab}}$

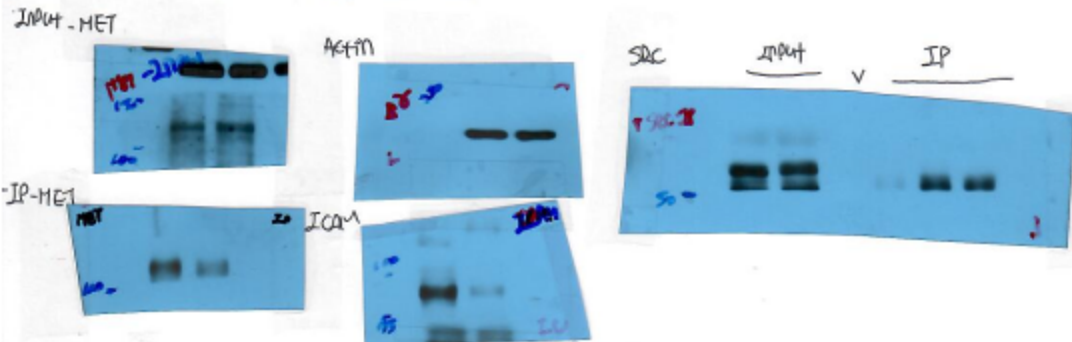

# Fig. S5

**SSA** Sw480 : CTR / Icam-ab

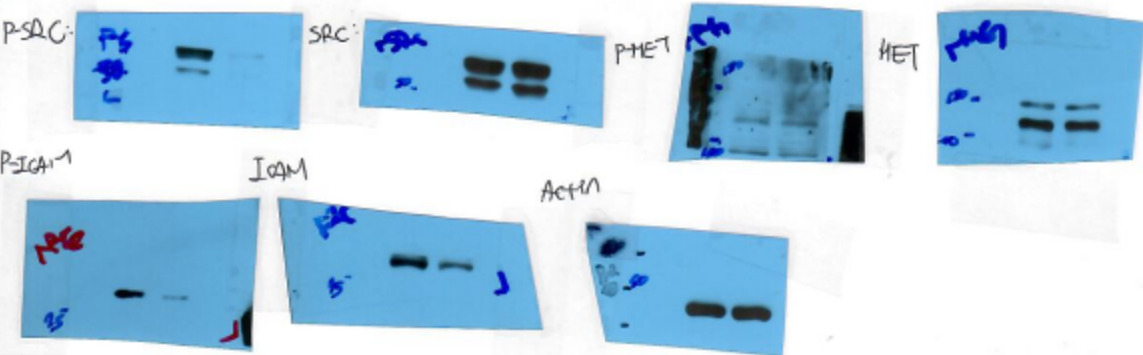

**SSC** Sw480 : CTR / Icam-ab

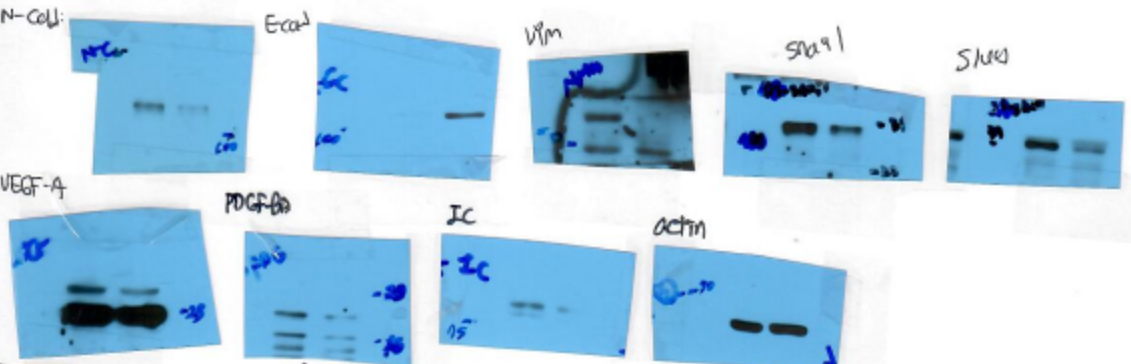

**SSD** Xenograft      CTR-Bo      Icam-ab

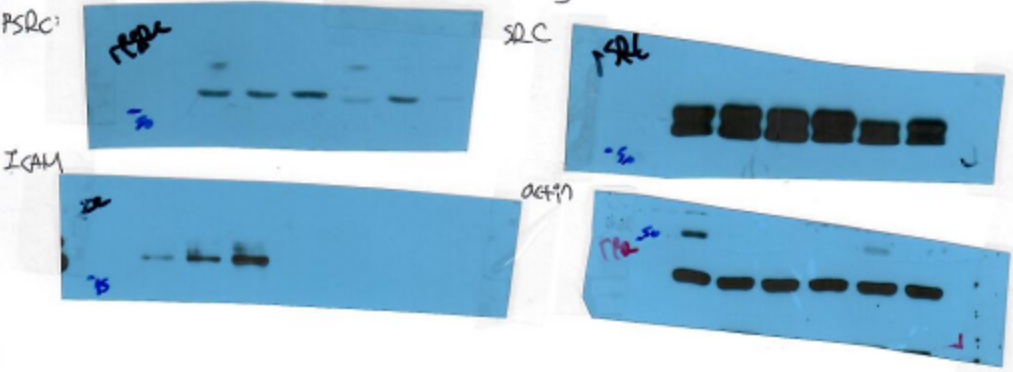

Fig\_55

SSE

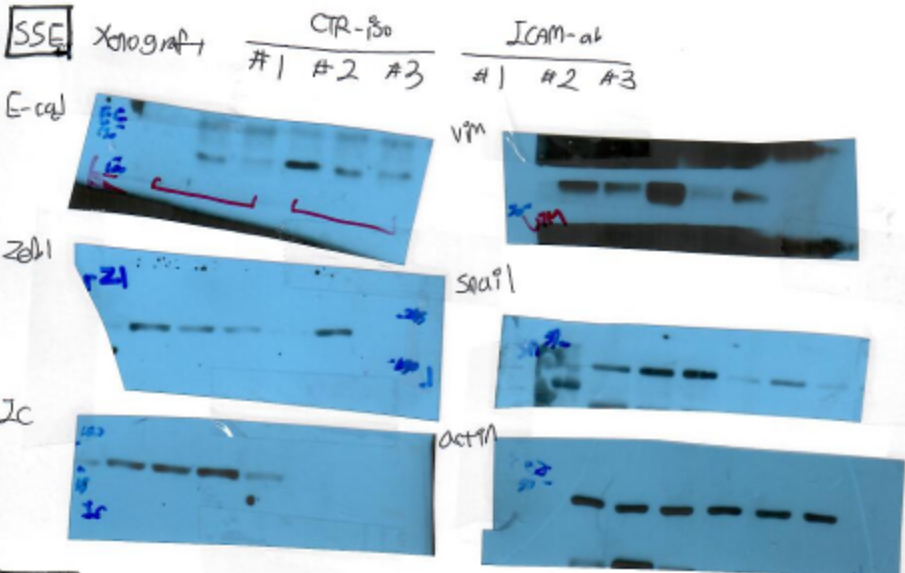

SSF

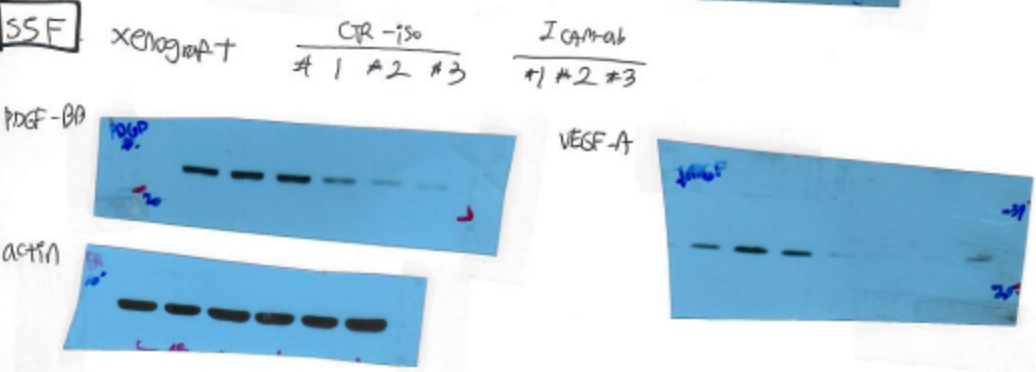

Supplement: 41419_2022_4862_MOESM2_ESM.pdf [file 41419_2022_4862_MOESM2_ESM.pdf]
