# Supplementary material for: ICAM-1 promotes cancer progression by regulating SRC activity as an adapter protein in colorectal cancer
Source: PubMed Central journal article supplement (PMC9054780; doi:10.1038/s41419-022-04862-1), 2022-04-29

**Fig.1G**

\* SW-480 : si-CTR / si-ICAM-1 / si-ICAM-1 #2

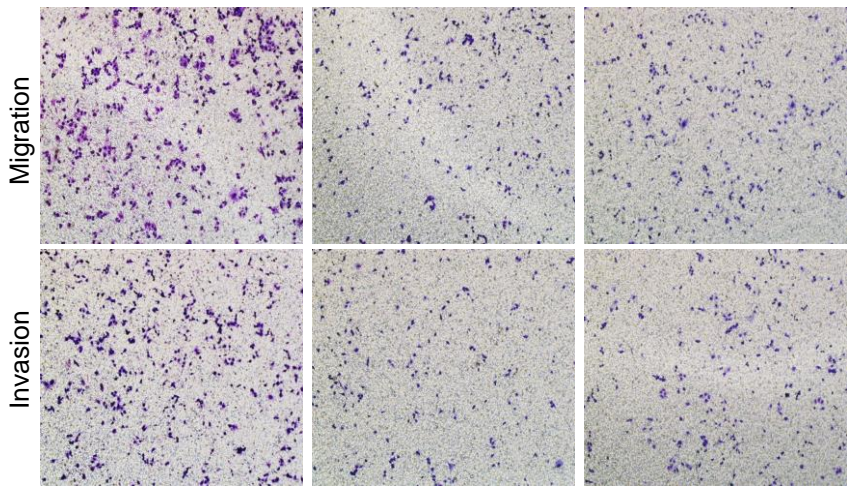

**Fig.1I**

\* Mouse xenograft : sh-CTR / sh-ICAM-1

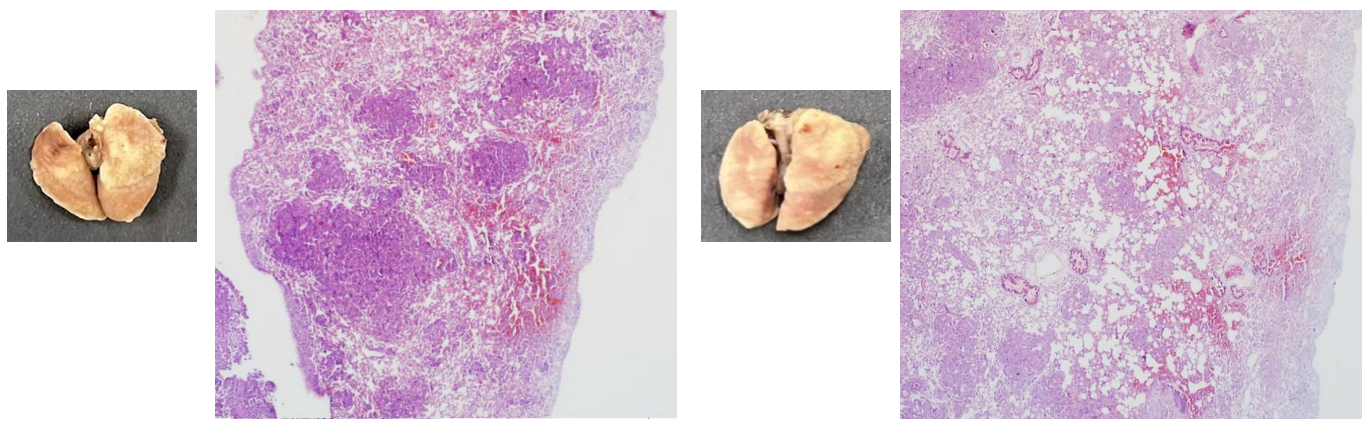

**Fig.1K**

\* Mouse xenograft : sh-CTR / sh-ICAM-1

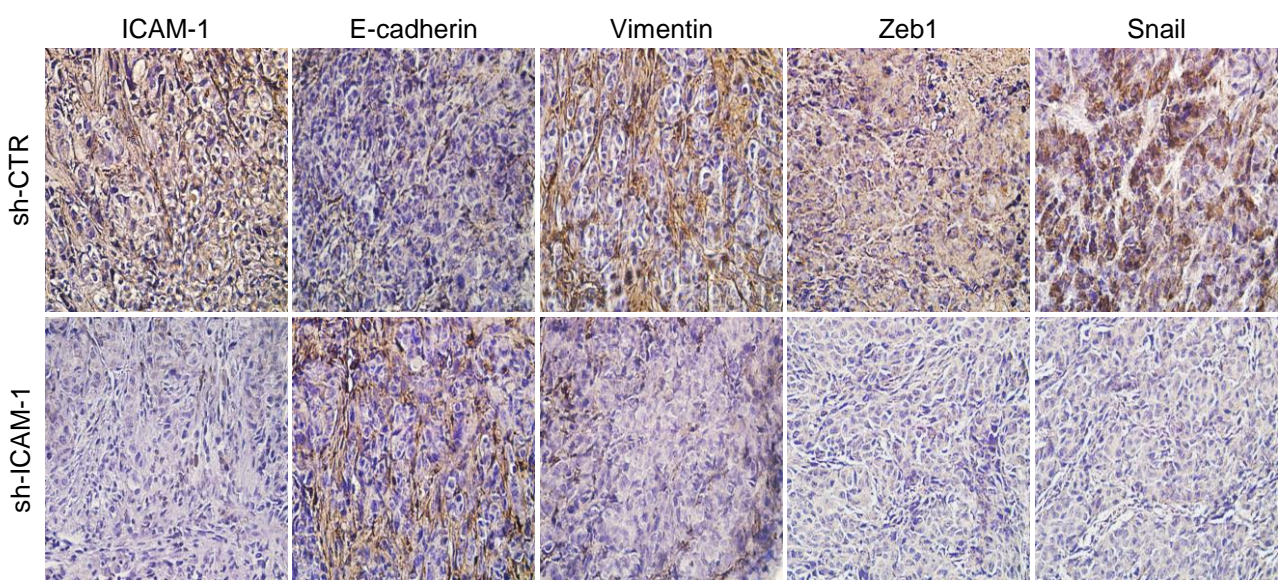

**Fig.1L**

\* SW-480 : si-CTR / si-ICAM-1 / si-ICAM-1 #2

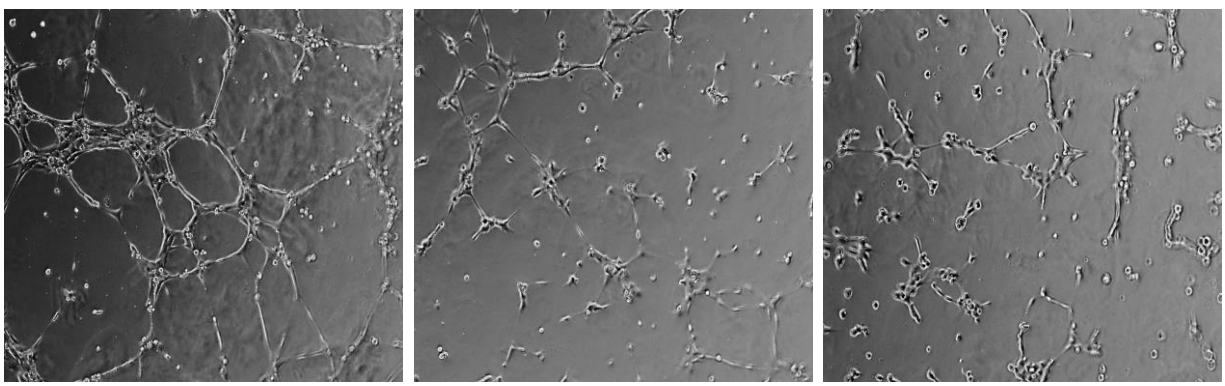

**Fig.1N**

\* Mouse xenograft : sh-CTR / sh-ICAM-1

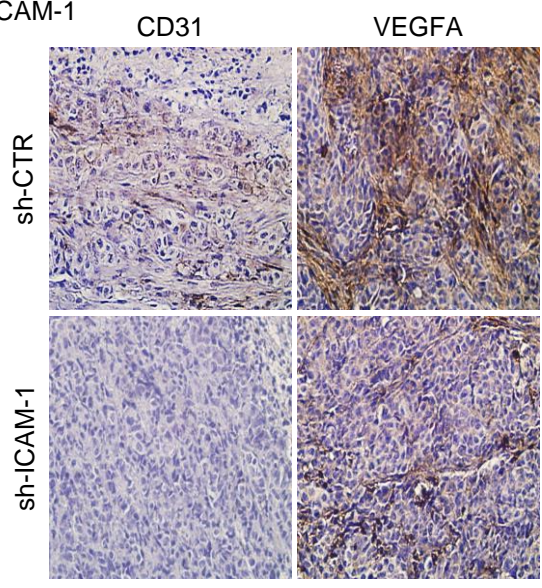

**Fig.10**

\* Mouse xenograft : sh-CTR / sh-ICAM-1

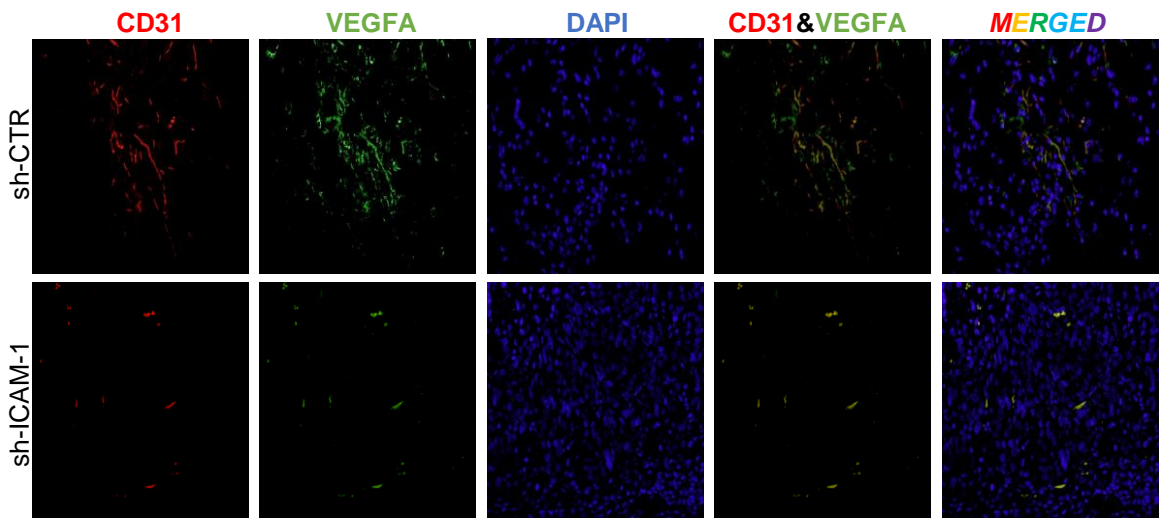

**Fig.S1C**

\* HT-29 : CTR / ICAM-1 O/E

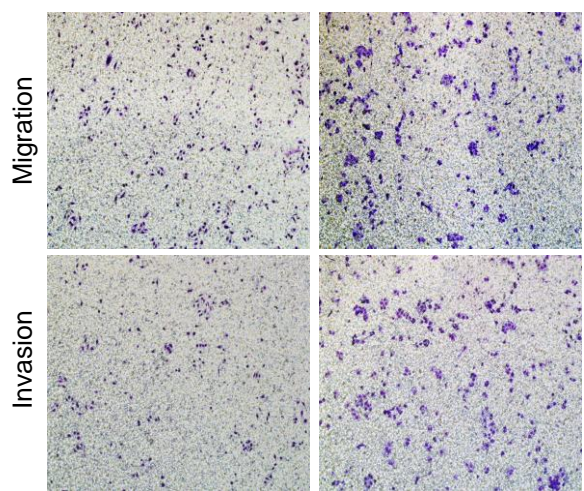

**Fig.1D**

\* HT-29 : CTR / ICAM-1 O/E

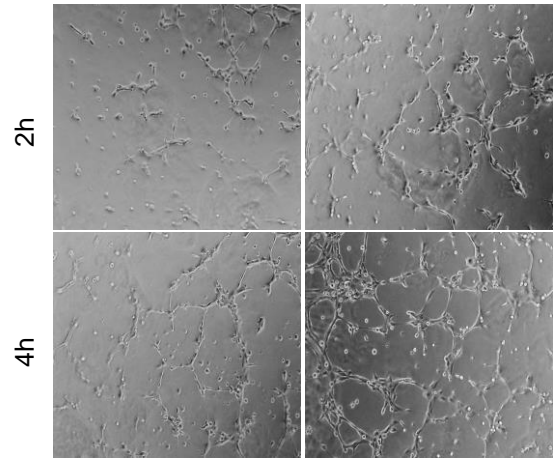

**Fig.1H**

\* Mouse xenograft – Tail vein injection : sh-CTR / sh-ICAM-1

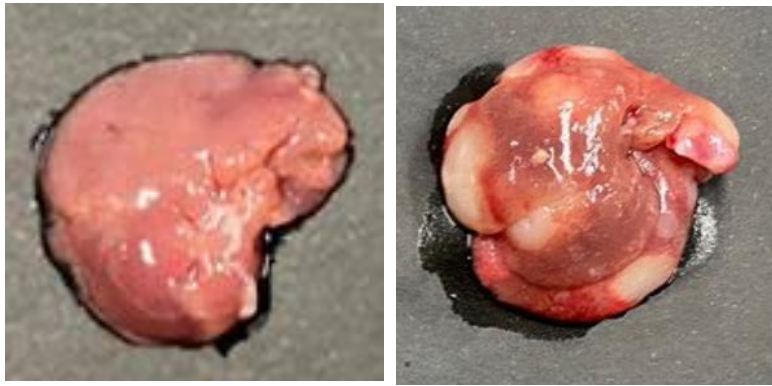

**Fig.1I**

\* Mouse xenograft – Tail vein injection : sh-CTR / sh-ICAM-1

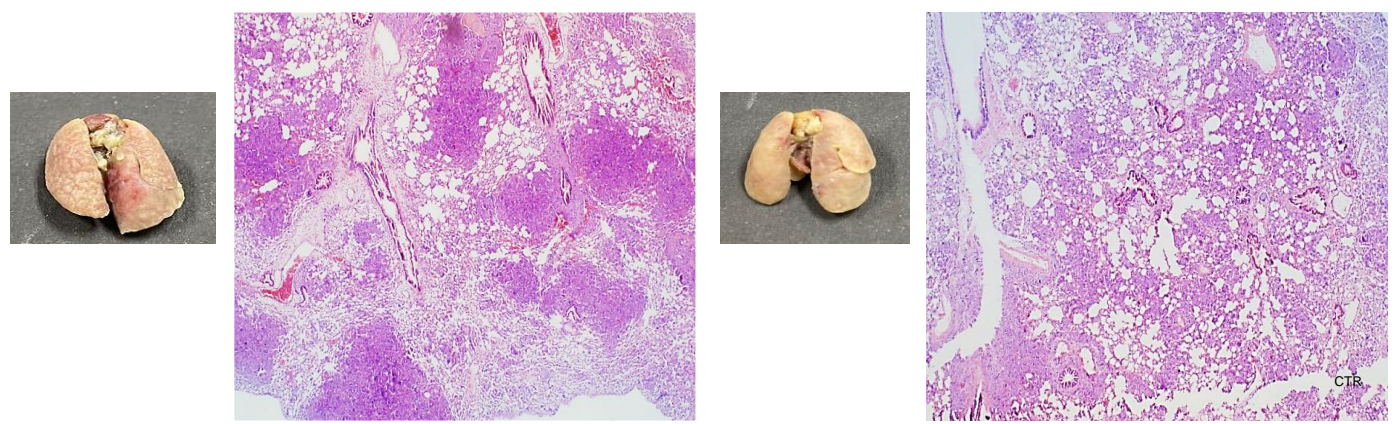

**Fig.2F**

\* Mouse xenograft : sh-CTR / sh-ICAM-1

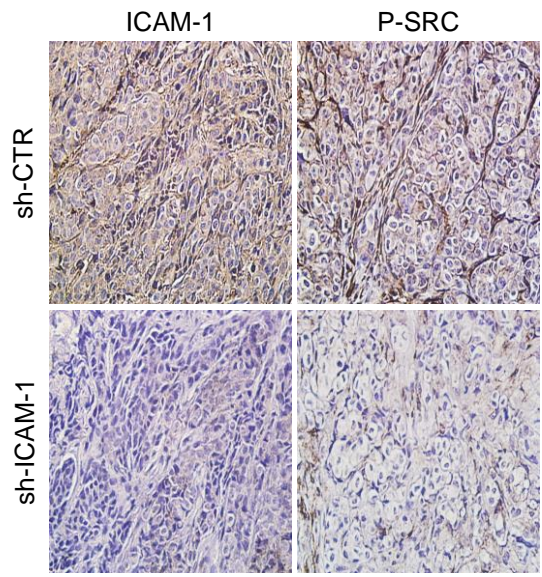

**Fig.2H**

\* HT-29 : CTR / ICAM-1 O/E / ICAM-1 O/E +SRCi

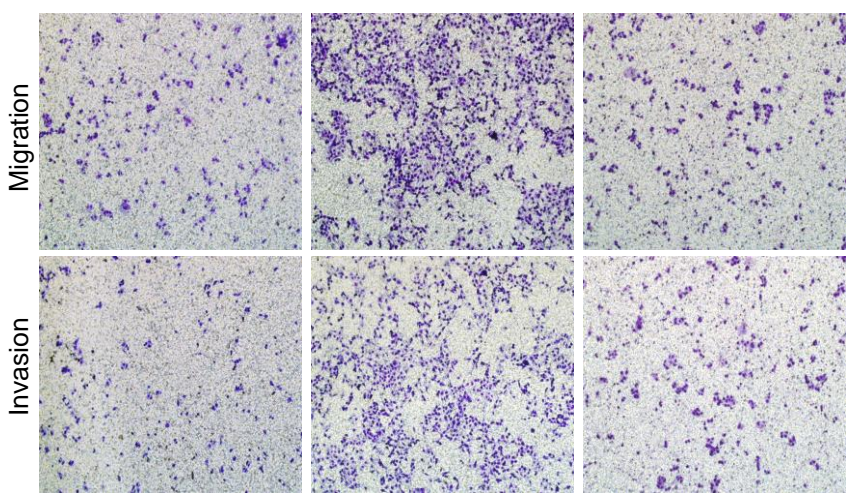

**Fig.2I**

\* HT-29 : CTR / ICAM-1 O/E / ICAM-1 O/E +SRCi

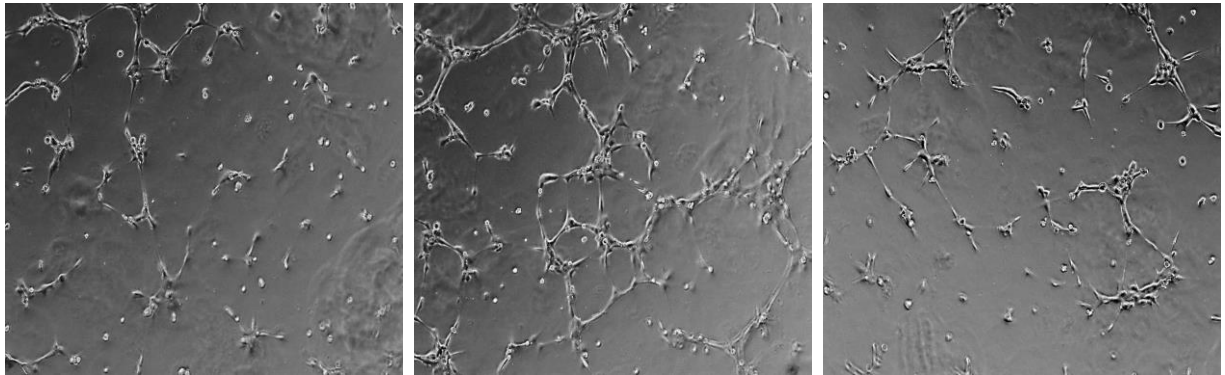

**Fig.2L**

\* HT-29 : CTR / ICAM-1 O/E / ICAM-1 O/E +STAT3i

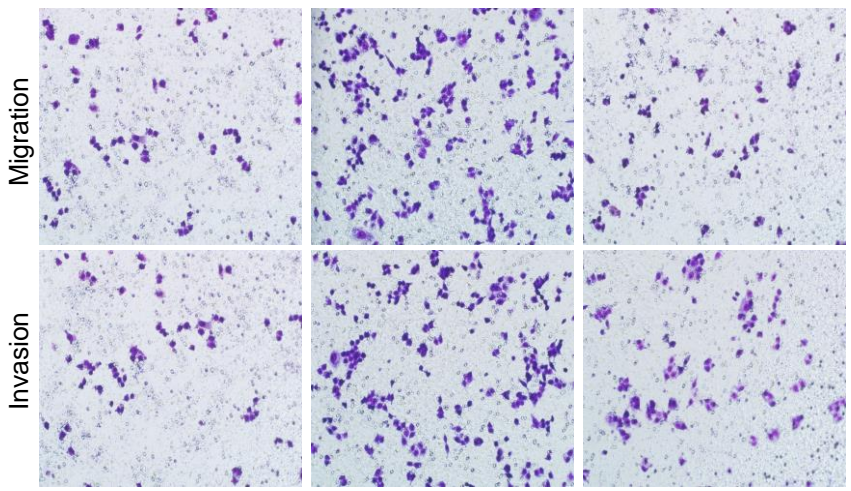

**Fig.2M**

\* HT-29 : CTR / ICAM-1 O/E / ICAM-1 O/E +STAT3i

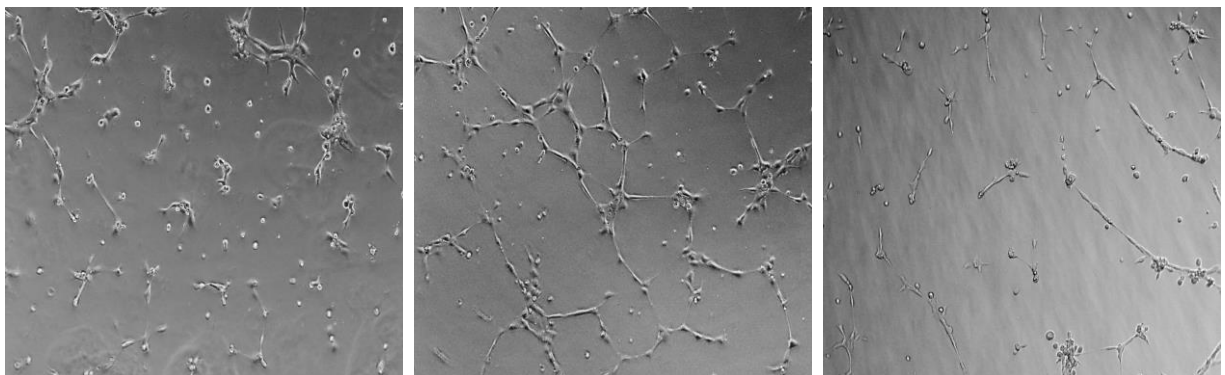

**Fig.S2D**

\* SW-480 : si-CTR / si-SRC #1 / si-SRC #2

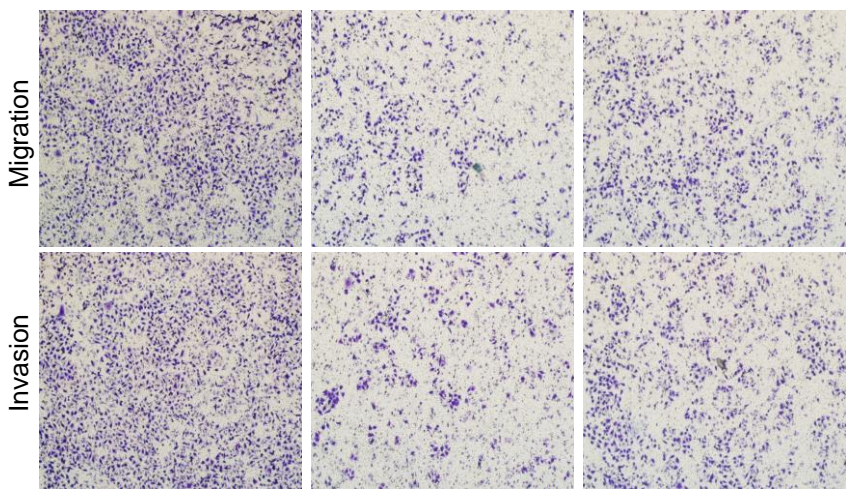

**Fig.S2E**

\* SW-480 : si-CTR / si-SRC #1 / si-SRC #2

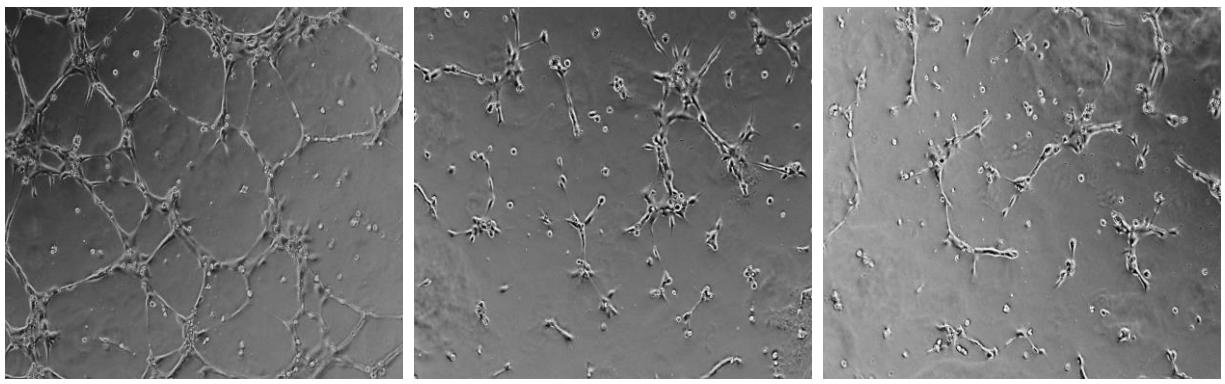

**Fig.S2G**

\* HT-29 : CTR / SRC O/E

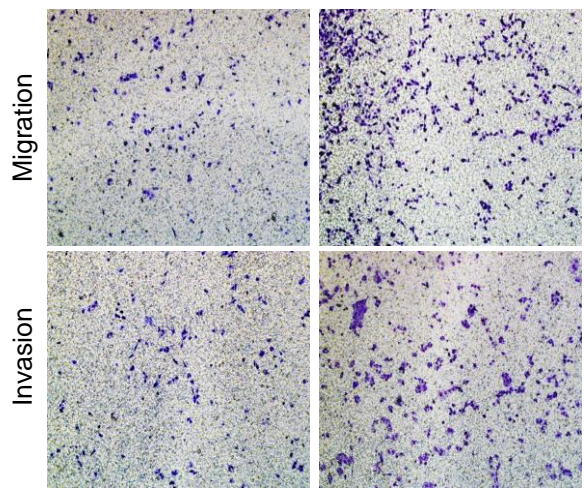

**Fig.S2H**

\* HT-29 : CTR / SRC O/E

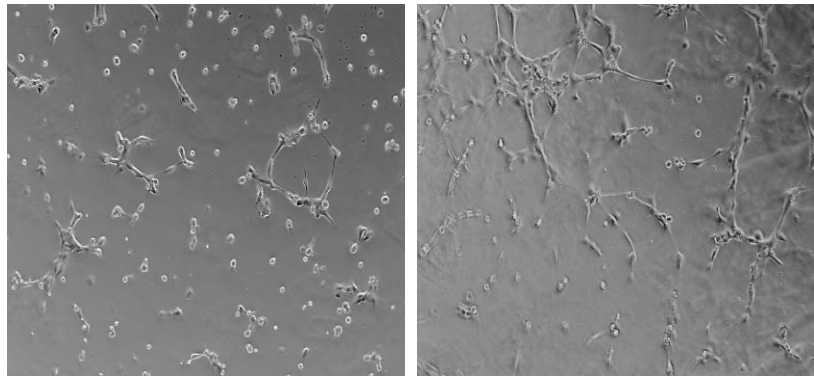

**Fig.S2J**

\* HT-29 : CTR / ICAM-1 / ICAM-1 +si-SRC #1 / ICAM-1 +si-SRC #2

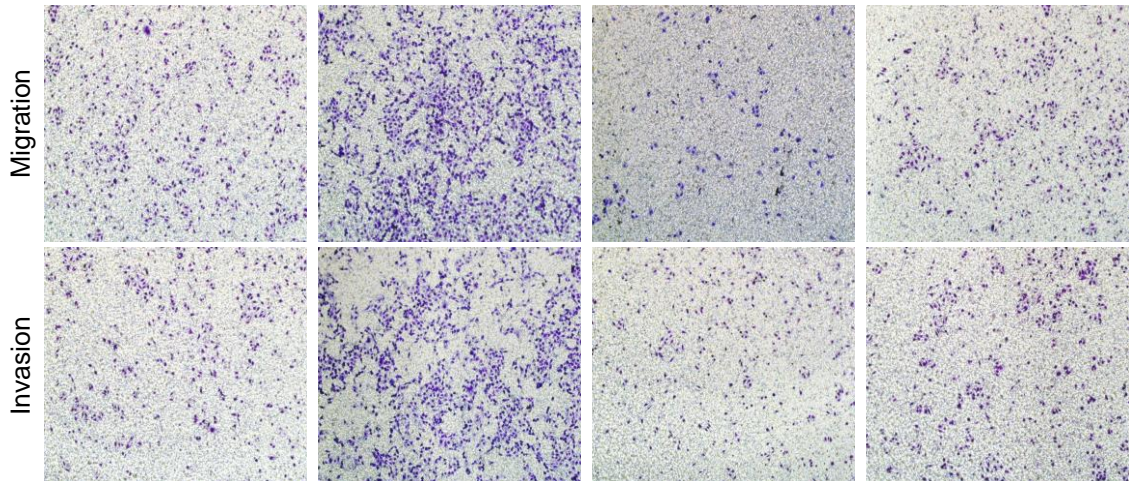

**Fig.S2K**

\* HT-29 : CTR / ICAM-1 / ICAM-1 +si-SRC #1 / ICAM-1 +si-SRC #2

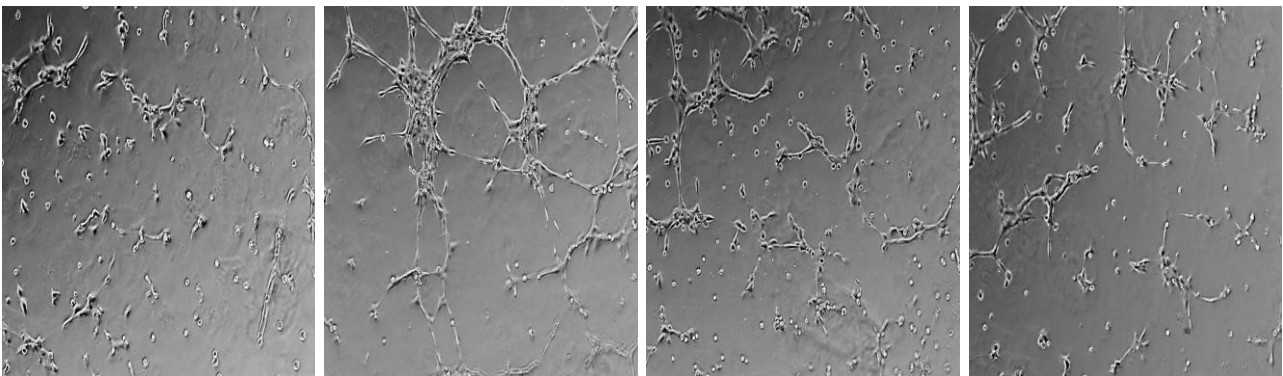

**Fig.3B – PLA**

\* SW-480 : ICAM-1 / ICAM1 +SRC

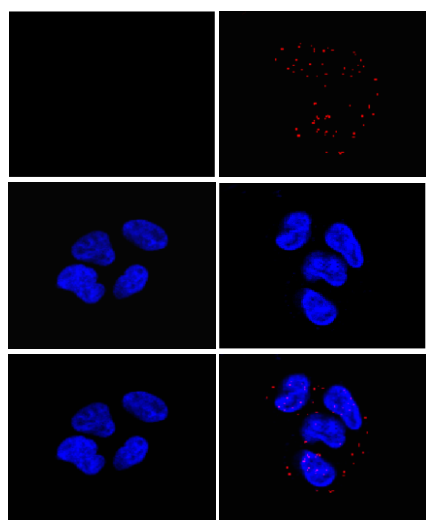

**Fig.3G - PLA**

\* 293T : - / WT / YA / YD

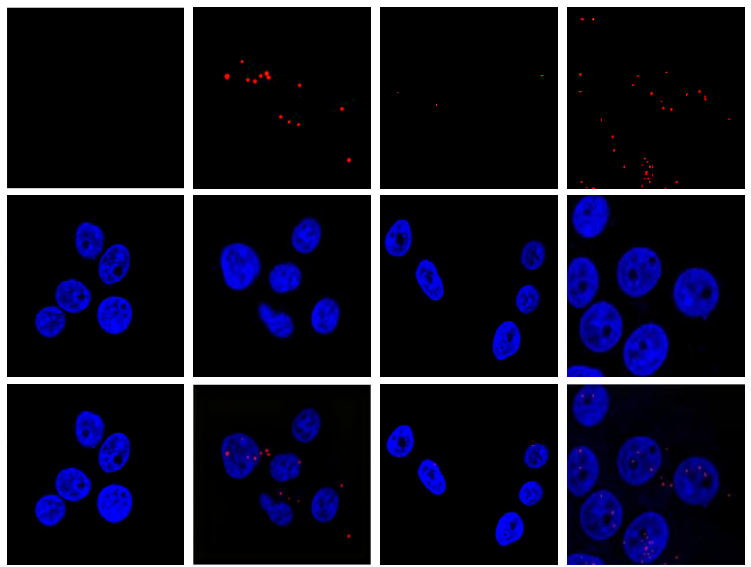

**Fig.3K**

\* HT-29 : - / WT / YA / YD

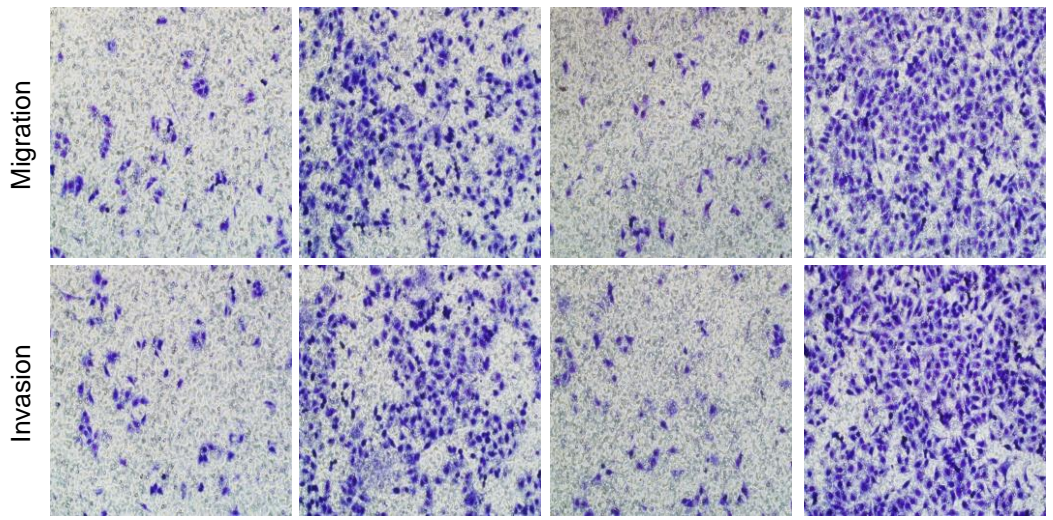



**Fig.3M**

\* HT-29 : - / WT / YA / YD

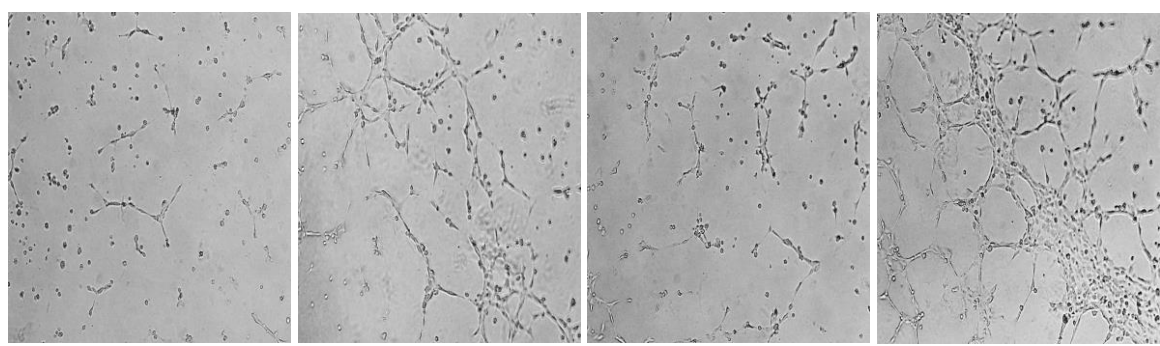

**Fig.S3A -PLA**

\* 293T : - / WT / ΔECD / ΔICD

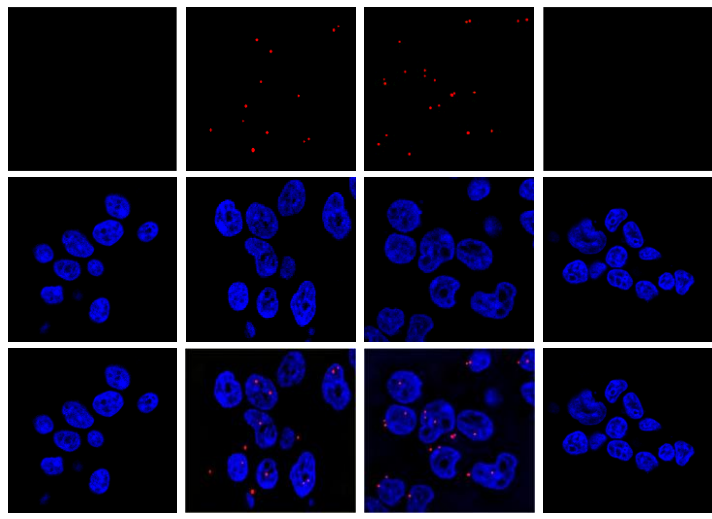

**Fig.4J - PLA**

\* SW-480 : CTR / si-ICAM-1

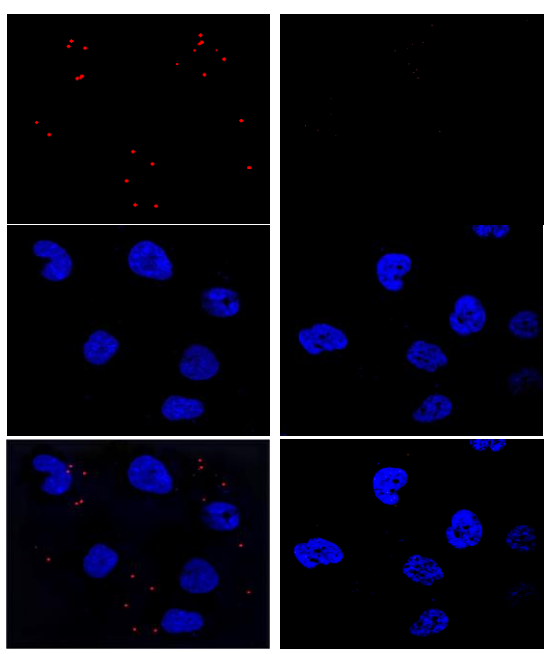

**Fig.4K - ICC**

\* HT-29 : SRC / SRC+IC / SRC+MET / SRC+IC+MET

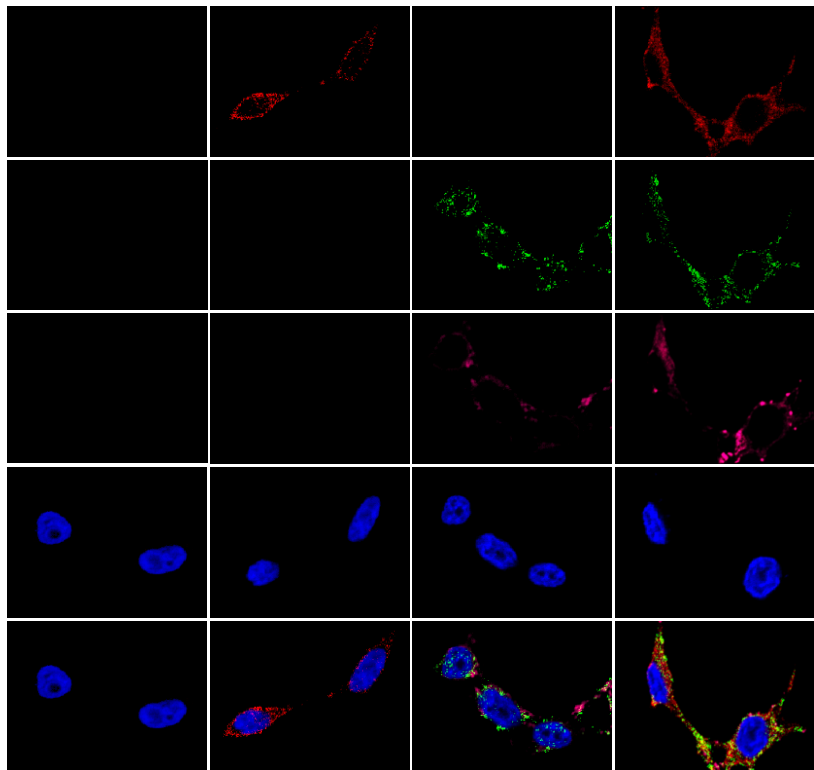

**Fig.4L**

\* HT-29 : SRC / SRC+IC / SRC+MET / SRC+IC+MET

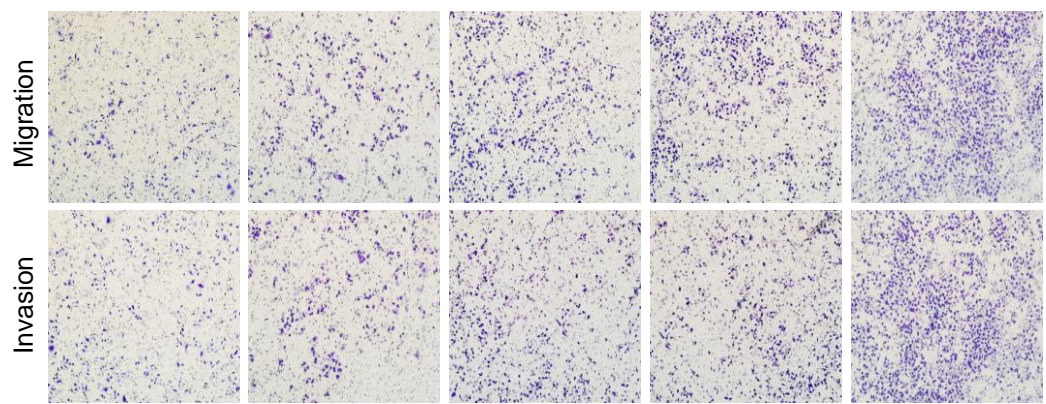

**Fig.4M**

\* HT-29 : SRC / SRC+IC / SRC+MET / SRC+IC+MET

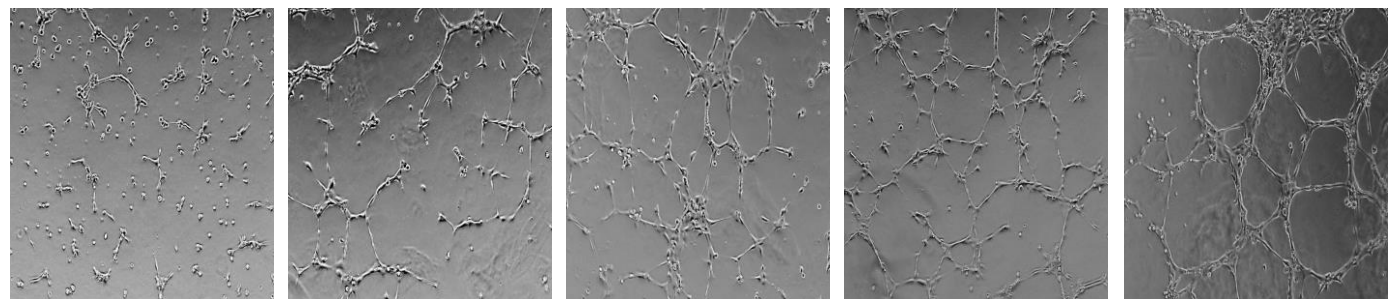

**Fig.5D**

\* SW-480 : CTR / ICAM-1 ab

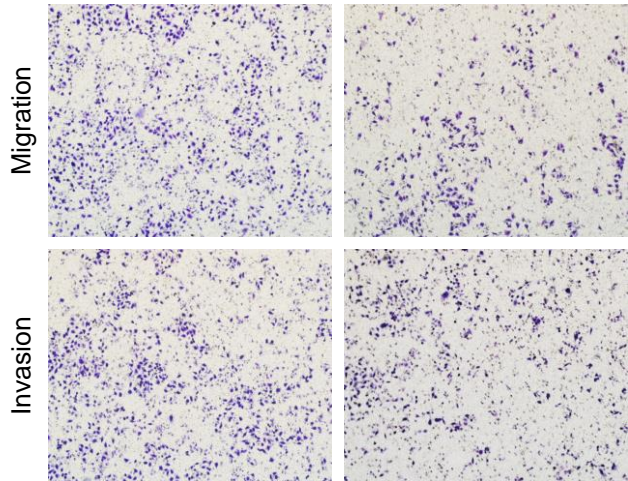

**Fig.5E**

\* SW-480 : CTR / ICAM-1 ab

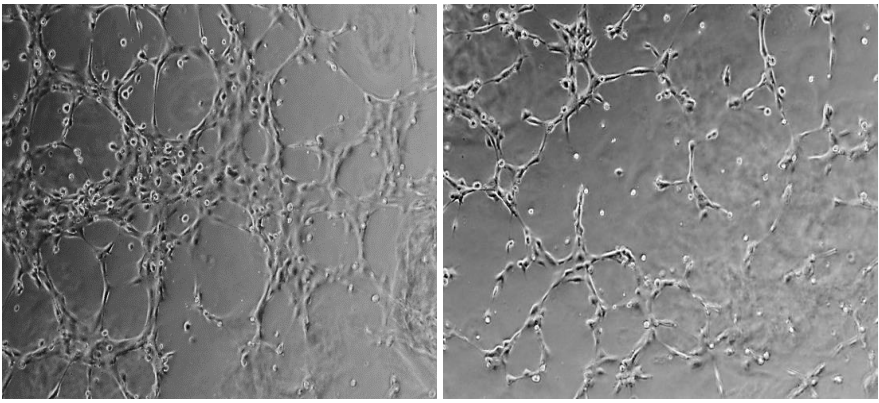

**Fig.5H**

\* Xenograft : CTR / ICAM-1 ab

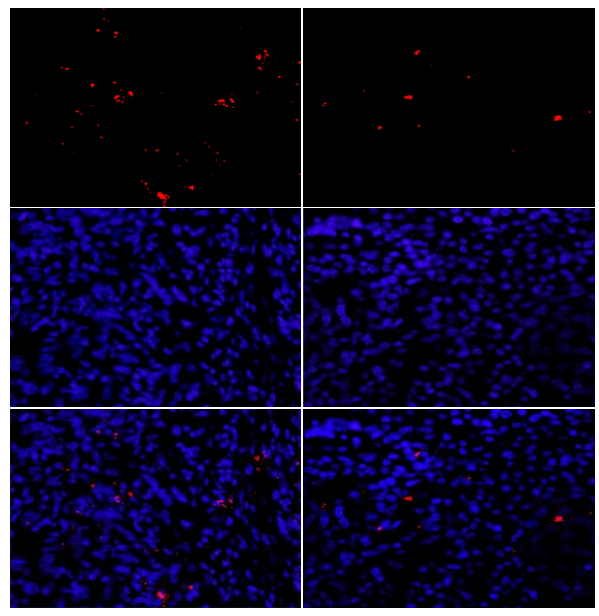

**Fig.5I**

\* Xenograft : CTR / ICAM-1 ab

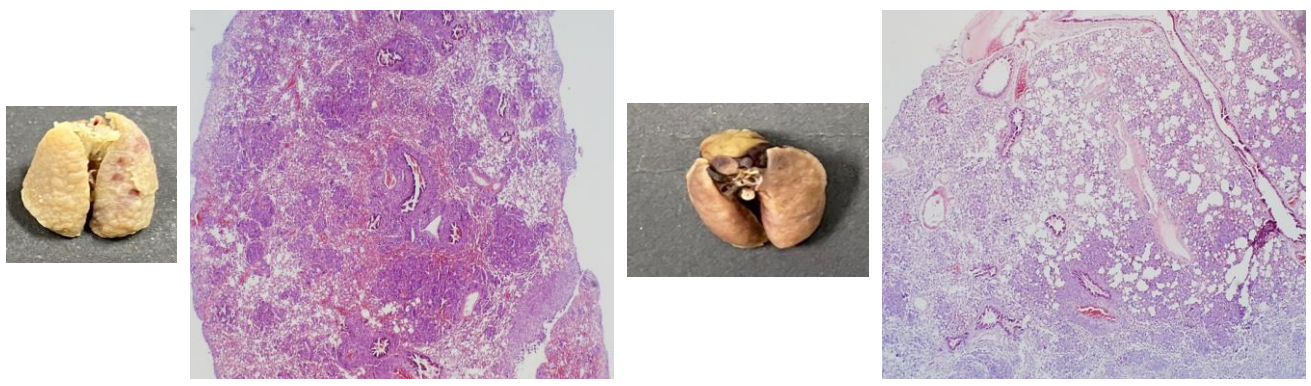

**Fig.5K**

\* Xenograft : CTR / ICAM-1 ab

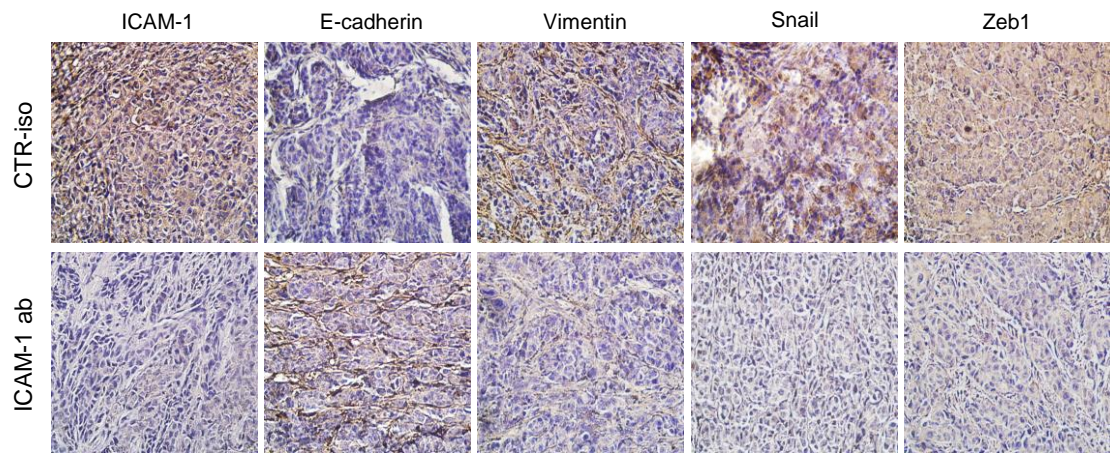

**Fig.5N**

\* Xenograft : CTR / ICAM-1 ab

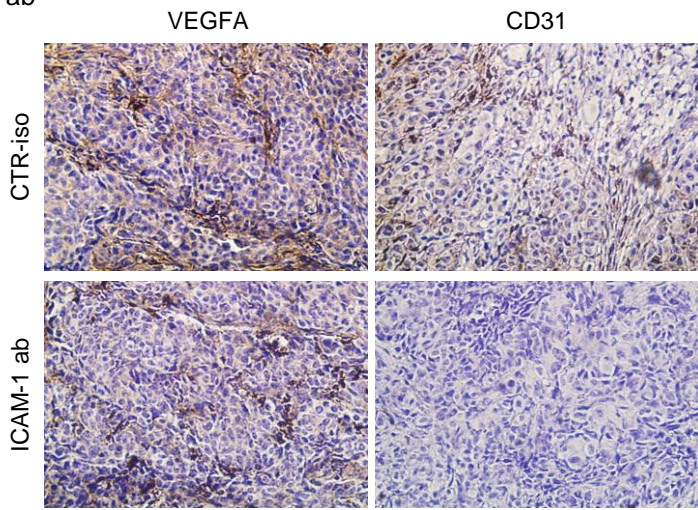

**Fig.5P**

\* Xenograft : CTR / ICAM-1 ab

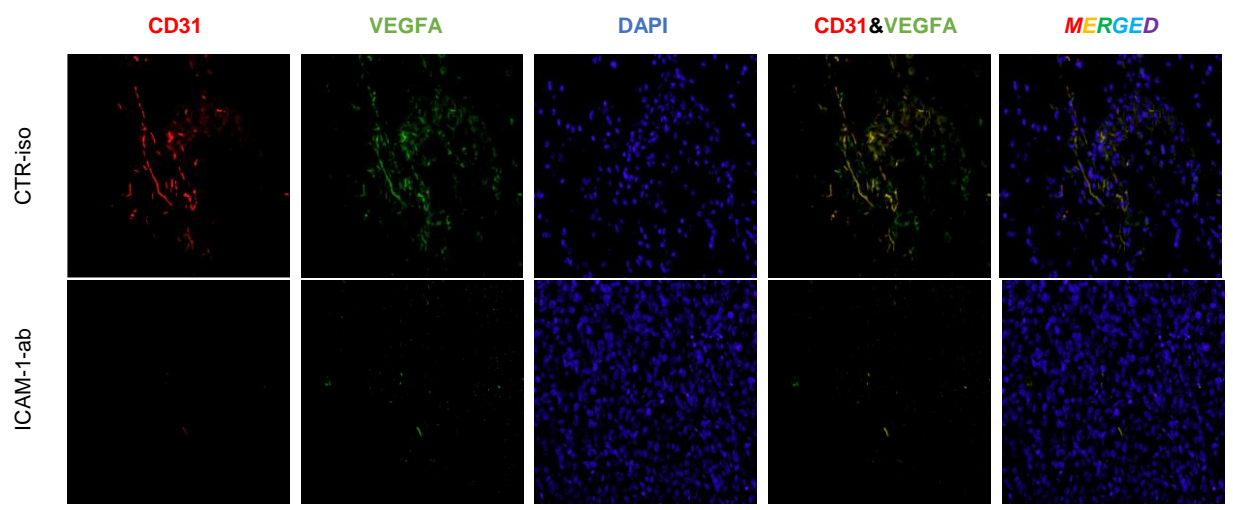

**Fig.6B**

\* Patient tissue array – ICAM-1 staining :stage 1 /2 /3 /4

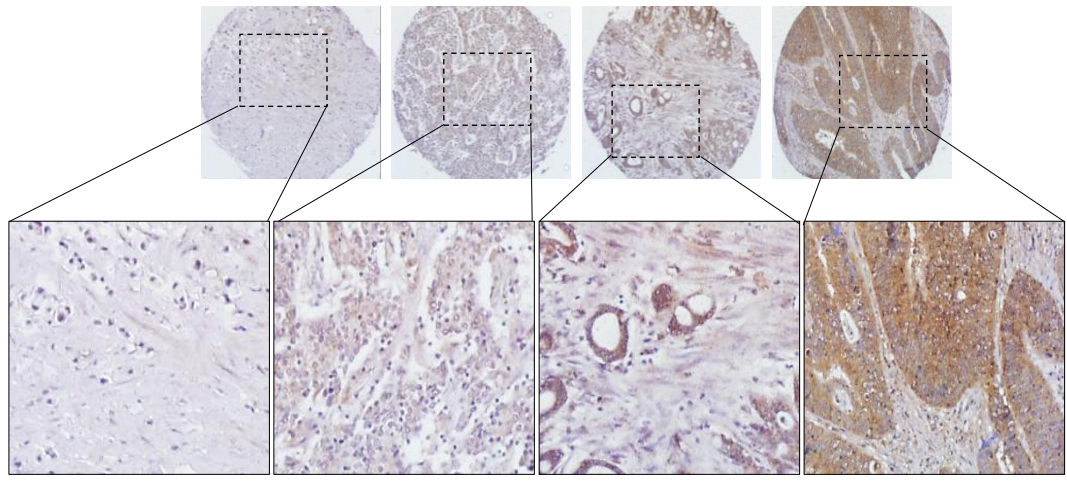

**Fig.6E**

\* Patient tissue array – ICAM-1 & p-SRC staining

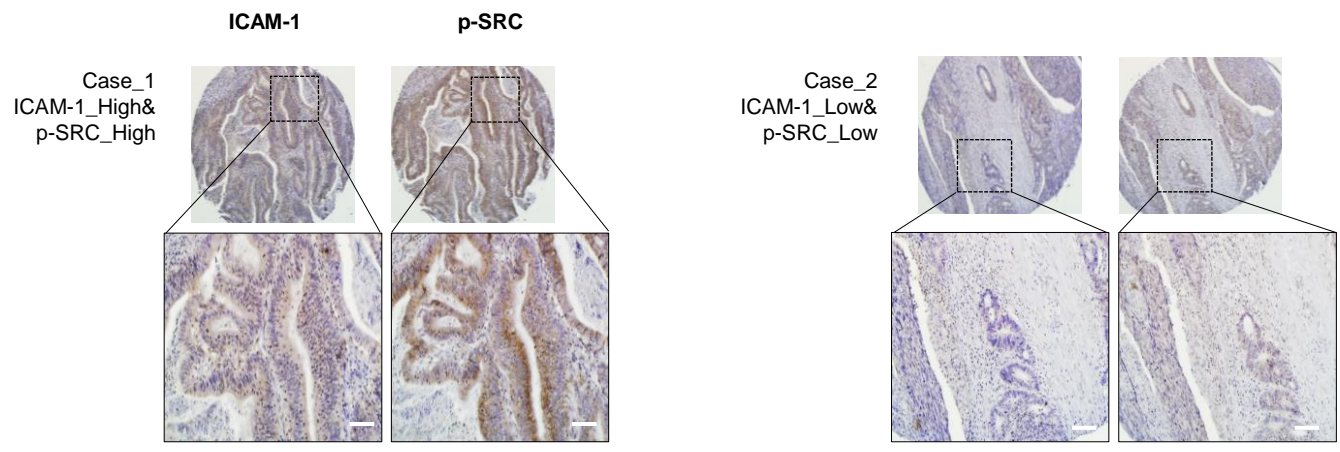

Supplement: 41419_2022_4862_MOESM3_ESM.pdf [file 41419_2022_4862_MOESM3_ESM.pdf]
